# Supplementary material for: The Biosynthesis and Transport of Ophiobolins in Aspergillus ustus 094102
Source: MDPI journal article supplement (doi:10.3390/ijms23031903), 2022-02-08
Supplement: s1 [file s1]

# Supporting Information

## Table of Contents

|                                                                                                                                                 |           |
|-------------------------------------------------------------------------------------------------------------------------------------------------|-----------|
| <b>Supplementary tables</b>                                                                                                                     | <b>3</b>  |
| Table S1 Proposed function of genes in <i>obl<sub>Au</sub></i> gene cluster                                                                     | 3         |
| Table S2 Primers used in this study                                                                                                             | 3         |
| Table S3 Putative FAD dependent oxidoreductase in <i>A. ustus</i> 094102                                                                        | 5         |
| Table S4 <sup>1</sup> H NMR (400 MHz) data of compound <b>1-7</b> and <b>10</b> in CDCl <sub>3</sub> [1-3]                                      | 6         |
| Table S5 <sup>13</sup> C NMR (100 MHz) data of compound <b>1-7</b> and <b>10</b> in CDCl <sub>3</sub> [1-3]                                     | 8         |
| Table S6 Plasmids used in this study                                                                                                            | 8         |
| <b>Supplementary figures</b>                                                                                                                    | <b>10</b> |
| Figure S1 <i>obl</i> gene cluster from <i>A. ustus</i> , <i>A. stellatus</i> , <i>A. clavatus</i> and <i>Bipolaris maydis</i> [4, 5]            | 10        |
| Figure S2 Gene expression level analysis of <i>oblA<sub>Au</sub>-D<sub>Au</sub></i> and <i>oblR<sub>Au</sub></i> by RNA-Seq (a) and RT-qPCR (b) | 10        |
| Figure S3 Screening of mutants                                                                                                                  | 11        |
| Figure S4 PCR verification of heterologous expression strains                                                                                   | 12        |
| Figure S5 HPLC analysis of crude extracts from <i>A. oryzae</i> expressing <i>oblA<sub>Au</sub>-D<sub>Au</sub></i>                              | 13        |
| Figure S6 HPLC analysis of cultural extracts of mutants $\Delta$ <i>oblA<sub>Au</sub></i> fed with compound <b>1</b> and <b>10</b>              | 13        |
| Figure S7 The inhibition test of 0-50 $\mu$ M of compound <b>2</b> and <b>3</b> on <i>A. oryzae</i>                                             | 14        |
| Figure S8 Docking of the modelled ObLC with different substrates                                                                                | 14        |
| <b>NMR and HR-ES spectrums</b>                                                                                                                  | <b>15</b> |
| Figure S9 <sup>1</sup> H NMR spectrum of compound <b>1</b> (400 MHz, CDCl <sub>3</sub> )                                                        | 15        |
| Figure S10 <sup>13</sup> C NMR spectrum of compound <b>1</b> (100 MHz, CDCl <sub>3</sub> )                                                      | 15        |
| Figure S11 <sup>1</sup> H NMR spectrum of compound <b>2</b> (400 MHz, CDCl <sub>3</sub> )                                                       | 16        |
| Figure S12 <sup>13</sup> C NMR spectrum of compound <b>2</b> (100 MHz, CDCl <sub>3</sub> )                                                      | 16        |
| Figure S13 ESI-HRMS spectrum of compound <b>2</b>                                                                                               | 17        |
| Figure S14 <sup>1</sup> H NMR spectrum of compound <b>3</b> (400 MHz, CDCl <sub>3</sub> )                                                       | 17        |
| Figure S15 <sup>13</sup> C NMR spectrum of compound <b>3</b> (100 MHz, CDCl <sub>3</sub> )                                                      | 18        |
| Figure S16 ESI-HRMS spectrum of compound <b>3</b>                                                                                               | 18        |
| Figure S17 <sup>1</sup> H NMR spectrum of compound <b>4</b> (400 MHz, CDCl <sub>3</sub> )                                                       | 19        |
| Figure S18 <sup>13</sup> C NMR spectrum of compound <b>4</b> (100 MHz, CDCl <sub>3</sub> )                                                      | 19        |
| Figure S19 ESI-HRMS spectrum of compound <b>4</b>                                                                                               | 20        |
| Figure S20 <sup>1</sup> H NMR spectrum of compound <b>5</b> (400 MHz, CDCl <sub>3</sub> )                                                       | 20        |
| Figure S21 <sup>13</sup> C NMR spectrum of compound <b>5</b> (100 MHz, CDCl <sub>3</sub> )                                                      | 21        |
| Figure S22 ESI-HRMS spectrum of compound <b>5</b>                                                                                               | 21        |
| Figure S23 <sup>1</sup> H NMR spectrum of compound <b>6</b> (400 MHz, CDCl <sub>3</sub> )                                                       | 22        |
| Figure S24 <sup>13</sup> C NMR spectrum of compound <b>6</b> (100 MHz, CDCl <sub>3</sub> )                                                      | 22        |
| Figure S25 ESI-HRMS spectrum of compound <b>6</b>                                                                                               | 23        |
| Figure S26 <sup>1</sup> H NMR spectrum of compound <b>7</b> (400 MHz, CDCl <sub>3</sub> )                                                       | 23        |
| Figure S27 <sup>13</sup> C NMR spectrum of compound <b>7</b> (100 MHz, CDCl <sub>3</sub> )                                                      | 24        |
| Figure S28 ESI-HRMS spectrum of compound <b>7</b>                                                                                               | 24        |
| Figure S29 <sup>1</sup> H NMR spectrum of compound <b>10</b> (400 MHz, CDCl <sub>3</sub> )                                                      | 25        |

|                                                                                                              |           |
|--------------------------------------------------------------------------------------------------------------|-----------|
| Figure S30 $^{13}\text{C}$ NMR spectrum of compound <b>10</b> (100 MHz, $\text{CDCl}_3$ ) .....              | 25        |
| Figure S31 ESI-HRMS spectrum of compound <b>10</b> .....                                                     | 26        |
| Figure S32 DEPT135 of compound <b>10</b> (100 MHz, $\text{CDCl}_3$ ).....                                    | 26        |
| Figure S33 $^1\text{H}$ - $^1\text{H}$ COSY spectrum of compound <b>10</b> (400 MHz, $\text{CDCl}_3$ ) ..... | 27        |
| Figure S34 HMBC spectrum of compound <b>10</b> (400 MHz, $\text{CDCl}_3$ ) .....                             | 27        |
| Figure S35 HSQC spectrum of compound <b>10</b> (400 MHz, $\text{CDCl}_3$ ) .....                             | 28        |
| <b>Supplementary references</b> .....                                                                        | <b>29</b> |

## Supplementary tables

**Table S1** Proposed function of genes in *obl<sub>Au</sub>* gene cluster

| Gene                    | Size (aa) | Proposed function                              | Species                   | Identity (%) | Sequence ID    |
|-------------------------|-----------|------------------------------------------------|---------------------------|--------------|----------------|
| <i>obl<sub>Au</sub></i> | 725       | Ophiobolin F synthase                          | <i>A. stellatus</i>       | 82.28        | A0A1V1FVQ6.1   |
|                         |           | OblA                                           | <i>A. clavatus</i> NRRL 1 | 65.34        | XP_001276070.1 |
|                         |           |                                                | <i>B. maydis</i> C5       | 61.37        | M2V8C1.1       |
| <i>obl<sub>Bu</sub></i> | 544       | Cytochrome P450                                | <i>A. stellatus</i>       | 79.38        | A0A1V1FNM9.1   |
|                         |           | monooxygenase OblB                             | <i>A. clavatus</i> NRRL 1 | 66.22        | XP_001276069.1 |
|                         |           |                                                | <i>B. maydis</i> C5       | 66.79        | M2V933.1       |
| <i>obl<sub>Du</sub></i> | 1464      | ABC transporter OblD                           | <i>A. stellatus</i>       | 85.64        | A0A1V1GB10.1   |
|                         |           |                                                | <i>A. clavatus</i> NRRL 1 | 78.04        | XP_001276075.1 |
|                         |           |                                                | <i>B. maydis</i> C5       | 74.90        | M2UCE5.1       |
| <i>obl<sub>Ru</sub></i> | 426       | Putative Zn (II) <sub>2</sub> Cys <sub>6</sub> | <i>A. nidulans</i> FGSC   | 21.96        | CBF83040.1     |
|                         |           | transcription factor                           | A4                        |              |                |
|                         |           |                                                | <i>A. stellatus</i>       | 50.54        | BAX09284.1     |

**Table S2** Primers used in this study

| Purpose                   | Primers                     | Sequence (5' to 3')                           |
|---------------------------|-----------------------------|-----------------------------------------------|
| For qPCR                  | q- <i>oblA</i> -s           | ATATTGTGGCTCTCAGCCTCG                         |
|                           | q- <i>oblA</i> -a           | CTGAGCCATGTGTTGAGCG                           |
|                           | q- <i>oblB</i> -s           | CCGTGACAGGCTACTACGAG                          |
|                           | q- <i>oblB</i> -a           | GTCGCGGATGGAGAGTTCAA                          |
|                           | q- <i>oblC</i> -s           | TGTCAGACCACTCGACCTCA                          |
|                           | q- <i>oblC</i> -a           | CCAAGGCACCAGCGTAGTAA                          |
|                           | q- <i>oblD</i> -s           | CAATTATCAAGGCGCGACTGC                         |
|                           | q- <i>oblD</i> -a           | GTATCTCCAACGGTGAGTCTGG                        |
|                           | q- <i>oblR</i> -s           | GGAACCTCCAGACTACAGCG                          |
|                           | q- <i>oblR</i> -a           | GGCGGATCAAGCTCTGCTAA                          |
| <i>sh ble</i>             | <i>sh ble</i> -up           | ATCGATGGGGACTAGTGATTAAGTGAGACCTTCGTTTGTGC     |
|                           | <i>sh ble</i> -down         | CTCACATGTTGGTCTCCAGCTTG                       |
| <i>hph</i>                | <i>hph</i> -s               | AAATTGACGCTTAGACAACTTAA                       |
|                           | <i>hph</i> -a               | GCAGCTTGCCAACATGGTG                           |
| <i>oblA</i> gene deletion | $\Delta$ <i>oblA</i> -L-s   | GAGACCAACATGTGAGAATCTCTAGACGAGTTGATGGTGGAGACG |
|                           | $\Delta$ <i>oblA</i> -L-a   | AGTTGTCTAAGCGTCAATTTGTCGAGTACTTATACTCCAT      |
|                           | $\Delta$ <i>oblA</i> -R-s   | CCACCATGTTGGCAAGCTGCTGGAGCTGCTGAAGGTTTGA      |
|                           | $\Delta$ <i>oblA</i> -R-a   | GTTGTAAAACGACGGCCAGTGAATTCGCCGAGTTATTAGTATGGA |
|                           | $\Delta$ <i>oblA</i> -yz-s  | GTCTCAGCTCGACACCACA                           |
|                           | $\Delta$ <i>oblA</i> -yz-a  | GCACCCAATCCAATGTTT                            |
| <i>oblB</i> gene deletion | $\Delta$ <i>oblB</i> -L-s   | GTCGACGATTATCGATGGGGACTAGTCACATCTCCACCTCCCTC  |
|                           | $\Delta$ <i>oblB</i> -L-a   | TACGGGACGGACGAGTCGGA                          |
|                           | <i>oblB</i> - <i>hph</i> -s | TCCGACTCGTCCGTCCCGTAAAATTGACGCTTAGACAACTTAA   |

|                                                 |                                       |                                                              |
|-------------------------------------------------|---------------------------------------|--------------------------------------------------------------|
| <i>oblC</i> gene deletion                       | $\Delta oblB$ -R-s                    | CCACCATGTTGGCAAGCTGCCGCTGGGATGGTAGAAG                        |
|                                                 | $\Delta oblB$ -R-a                    | GTTGTAAAACGACGGCCAGTGAATTCCTTGGCATCAGCGTGGTA                 |
|                                                 | $\Delta oblB$ -yz-s                   | TCCACCCACGAATCATC                                            |
|                                                 | $\Delta oblB$ -yz-a                   | CCGACGCATCCATTGTAG                                           |
|                                                 | $\Delta oblC$ -L-s                    | GCTATGACCATGATTACGCCAAGCTTATTGAGAAGGAGGAGTTGG                |
|                                                 | $\Delta oblC$ -L-a                    | AGTTGTCTAAGCGTCAATTTGGCTGGACGAAGTAAGTAGA                     |
|                                                 | $\Delta oblC$ -R-s                    | CCACCATGTTGGCAAGCTGCAATCTTTTGTGGTTTCTTTTGGC                  |
|                                                 | $\Delta oblC$ -R-a                    | GTTGTAAAACGACGGCCAGTGAATTCACAGACCTTGTGTCTCC                  |
|                                                 | $\Delta oblC$ -yz-s                   | CCCATTCTTAGTCAGTTCTTG                                        |
|                                                 | $\Delta oblC$ -yz-a                   | CCTCTTCGGTCTTGTGGTA                                          |
| <i>oblD</i> gene deletion                       | $\Delta oblD$ -L-s                    | GAATCTCTAGAGGATCCCCGGTACCGTGGATAAGCAGAGGCAAT<br>A            |
|                                                 | $\Delta oblD$ -L-a                    | AGTTGTCTAAGCGTCAATTTGACGGATGTCAAGAAGAGC                      |
|                                                 | $\Delta oblD$ -R-s                    | CCACCATGTTGGCAAGCTGCTACCGTCGTCGAAATCGT                       |
|                                                 | $\Delta oblD$ -R-a                    | GTTGTAAAACGACGGCCAGTGAATTCGAGGGAGGTGGAGATGTG<br>AG           |
|                                                 | $\Delta oblD$ -yz-s                   | GAGGCTATGCGTATGTTGC                                          |
| <i>oblR</i> gene deletion                       | $\Delta oblD$ -yz-a                   | CTTCTGCCGTTTGGATGG                                           |
|                                                 | $\Delta oblR$ -L-s                    | GTCGACGATTATCGATGGGGACTAGTTGAGGAAGGTGGAGCAGC                 |
|                                                 | $\Delta oblR$ -L-a                    | AGTTGTCTAAGCGTCAATTTGGTGAGACGAGCCGTGTTT                      |
|                                                 | $\Delta oblR$ -R-s                    | CCACCATGTTGGCAAGCTGCTTTGAATTGCATCGAATAGGGG                   |
|                                                 | $\Delta oblR$ -R-a                    | GTTGTAAAACGACGGCCAGTGAATTCGCCCGTCATGAAGGACTAT                |
|                                                 | $\Delta oblR$ -yz-s                   | GCTGAGGAACGACCAATC                                           |
|                                                 | $\Delta oblR$ -yz-a                   | GACGTTTGGTCGCTGATC                                           |
| For heterologous expression in <i>A. oryzae</i> | AO- <i>oblA</i> -F                    | TAAACCCACAGCAAGCTCCGAATTCATGGAGTATAAGTACTCGA<br>C            |
|                                                 | AO- <i>oblA</i> -R                    | TTCACGAGCTACTACAGATCCCCGGGTCAAACCTTCAGCAGCTCC<br>A           |
|                                                 | AO- <i>oblB</i> -F                    | TAAACCCACAGCAAGCTCCGAATTCATGGAGGCCTACCTGCCCC<br>AA           |
|                                                 | AO- <i>oblB</i> -T <sub>oblB</sub> -R | AAATGATCAAAACACCATGAAGATGTTTCAGCGCCACGT                      |
|                                                 | Pamy-F                                | TGACGTGGCGCTGAACATCTTCATGGTGTTTTGATCAT                       |
|                                                 | Pamy-R                                | GTCGAGTACTTATACTCCATCTGTGGGGTTTATTGTTTCAG                    |
|                                                 | Adea-Pamy-F                           | GTTGCGCAGATATCCATATGACTAGTTCATGGTGTTTTGATCAT                 |
|                                                 | Pamy-R'                               | TTCACGAGCTACTACAGATCTCACTCCTTCTTGCCATCGC                     |
|                                                 | Tamy-F                                | GCGATGGCAAGAAGGAGTGAGATCTGTAGTAGCTCGTGAA                     |
|                                                 | Adea-Tamy-R                           | TTGCATGCCTGCAGGTGCAGCTCTAGACCATCGATGGATCTCCTTT<br>GCTTTCTGCC |
|                                                 | AO- <i>oblD</i> -F                    | TAAACCCACAGCAAGCTCCGAATTCATGGCCACATCAAACGATT<br>TC           |
|                                                 | AO- <i>oblD</i> -R                    | TTCACGAGCTACTACAGATCTCACTCCTTCTTGCCATCGC                     |
|                                                 | AO- <i>oblC</i> -F                    | GTTGCGCAGATATCCATATGACTAGTTCATGGTGTTTTGATCAT                 |
|                                                 | AO- <i>oblC</i> --T <sub>oblC</sub> R | TTGCATGCCTGCAGGTGCAGCTCTAGAGGATGCACAAGGCAACGG<br>T           |

|                       |                      |                                                    |
|-----------------------|----------------------|----------------------------------------------------|
|                       | Pamy- <i>oblC</i> -F | AAAAGGAGATCCATCGATGGTCTAGATCATGGTGTTTTGATCAT       |
|                       | Pamy- <i>oblC</i> -R | AAAAGAAACCACAAAAGATTTCATAGGCCCTCAACAAG             |
| <i>eGFP</i>           | eGFP-F               | TAAACCCACAGCAAGCTCCGAATTCATGGTGAGCAAGGGCGAG<br>GA  |
|                       | eGFP-A               | CTTGTACAGCTCGTCCATGC                               |
| <i>oblA</i>           | eGFP- <i>oblA</i> -F | GCATGGACGAGCTGTACAAGATGGAGTATAAGTACTCGAC           |
|                       | eGFP- <i>oblA</i> -R | GATCCCCGGGTACCGAGCTCGAATTCATAAACCTTCAGCAGCTCC<br>A |
| <i>oblB</i>           | eGFP- <i>oblB</i> -F | GCATGGACGAGCTGTACAAGATGGAGGCCTACCTGCCCCAA          |
|                       | eGFP- <i>oblB</i> -R | GATCCCCGGGTACCGAGCTCGAATTCATATGGTACACAACGCGA<br>A  |
| <i>oblC</i>           | eGFP- <i>oblC</i> -F | GCATGGACGAGCTGTACAAGATGCCTCTCCCTAAATCAT            |
|                       | eGFP- <i>oblC</i> -R | GATCCCCGGGTACCGAGCTCGAATTCATAGGCCCTCAACAAGC<br>G   |
| <i>oblD</i>           | eGFP- <i>oblD</i> -F | GCATGGACGAGCTGTACAAGATGGCCACATCAAACGATT            |
|                       | eGFP- <i>oblD</i> -R | GATCCCCGGGTACCGAGCTCGAATTCCTCTCTTGCCATCGC          |
| Partial of <i>arg</i> | Arg-S                | ATCTCATACCCGTCAACTCA                               |
| gene                  | Arg-A                | ACTCGCCTCATCCGTCAT                                 |
| Partial of <i>ade</i> | Ade-S                | AATGACTTGGGTAAGACGG                                |
| gene                  | Ade-A                | CTGAATGGGCTAAGGAGA                                 |

**Table S3** Putative FAD dependent oxidoreductase in *A. ustus* 094102

| Genes          | Identity | FPKM in ophs (+) | FPKM in ophs (-) |
|----------------|----------|------------------|------------------|
| <i>au-orf1</i> | 58%      | 378.81           | 2.35             |
| <i>au-orf2</i> | 37%      | 3.26             | 3.56             |
| <i>au-orf3</i> | 33%      | 4.11             | 34.4             |

Note: oph(+), ophiobolin-producing strain; oph(-), ophiobolin-nonproducing strain; FPKM, Fragments Per Kilobase of exon model per Million mapped fragments.

**Table S4** <sup>1</sup>H NMR (400 MHz) data of compound **1-7** and **10** in CDCl<sub>3</sub> [1-3]

| Position | $\delta$ H (J in Hz)          |                                               |                                   |                                         |                     |                                         |                                  |                                 |
|----------|-------------------------------|-----------------------------------------------|-----------------------------------|-----------------------------------------|---------------------|-----------------------------------------|----------------------------------|---------------------------------|
|          | 1                             | 2                                             | 3                                 | 4                                       | 5                   | 6                                       | 7                                | 10                              |
| 1        | 1.86 m,<br>1.94 m             | 1.20 (d, 14.6),<br>1.79 (d, 2.9)              | 1.24 m,<br>1.81 (dd, 14.6, 3.2)   | 1.56 m,<br>1.76 m                       | 1.16 m,<br>2.04 m   | 1.59 m,<br>1.80 m                       | 2.04 (d, 3.6),<br>1.18 (t, 13.1) | 1.19 m, 1.87 m                  |
| 2        | 1.60 m                        | 2.37 (dt, 19.0, 4.4)                          | 2.39 m                            | 2.14 m                                  | 2.67 m              | 2.12 m                                  | 2.68 m                           | 1.67 m                          |
| 4        | 1.68 m                        | 2.51 (d, 19.2),<br>2.81 (d, 19.2)             | 2.50 (d, 19.2),<br>2.80 (d, 19.3) | 2.43 (dd, 16.8, 1.5),<br>3.08 (d, 16.7) | 6.03 (t, 1.6)       | 2.42 (dd, 16.7, 1.6)                    | 6.06 s                           | 1.74 m, 1.91 m                  |
| 5        | 1.39 m, 1.52 m                |                                               |                                   |                                         |                     |                                         |                                  | 1.36 m, 1.53 m                  |
| 6        | 3.17 (t, 8.2)                 | 3.28 (d, 10.5)                                | 3.27 (d, 10.5)                    | 3.35 (d, 10.8)                          | 3.44 (d, 4.2)       | 3.30 (d, 10.6)                          | 3.41 (d, 3.8)                    | 3.14 (t, 8.4)                   |
| 8        | 5.53 (tt, 8.2, 1.5)           | 7.14 (t, 8.6)                                 | 7.22 (t, 8.5)                     | 6.89 (dd, 6.7, 2.2)                     | 6.84 (dd, 6.3, 2.4) | 6.87 (dd, 6.8, 2.3)                     | 6.84 (d, 4.3)                    | 6.00 (dt, 11.5, 1.3)            |
| 9        | 1.99 m                        | 2.97 (dd, 12.6, 8.3),<br>2.13 (dd, 12.5, 7.6) | 2.29 m,<br>2.44 m                 | 2.65 m,<br>2.21 m                       | 2.70 m,<br>2.26 m   | 2.17 (d, 14.6),<br>2.83 (dt, 20.5, 3.2) | 2.94 (d, 20.4),<br>2.25 m        | 1.83 m,<br>2.02 (qd, 9.6, 6.9)  |
| 10       | 1.68 m                        | 1.57 m                                        | -                                 | 2.60 m                                  | 2.70 m              | 2.51 m                                  | 2.64 m                           | 1.93 m                          |
| 12       | 1.33 m, 1.49 m                | 1.42 m,<br>1.44 m                             | 1.39 m,<br>1.46 m                 | 1.41 m,<br>1.47 m                       | 1.40 m,<br>1.49 m   | 1.47 m,<br>1.50 m                       | 1.55 m, 1.46 (td,<br>12.3, 4.9)  | 1.44 (dd, 13.6, 3.2),<br>1.52 m |
| 13       | 1.25 m, 1.49 m                | 1.25 m,<br>1.61 m                             | 1.43 m,<br>1.54 m                 | 1.16 (qd, 12.2, 5.8),<br>1.56 m         | 1.24 m,<br>1.58 m   | 1.20 m,<br>1.68 m                       | 1.27 m,<br>1.69 m                | 1.33 m, 1.74 m                  |
| 14       | 2.27 (dtd, 13.3,<br>8.8, 4.4) | 2.08 (t, 9.5)                                 | 2.35 m                            | 1.76 m                                  | 1.73 m              | 1.89 m                                  | 1.91 m                           | 2.27 (dd, 13.9, 8.1)            |
| 15       | 1.68 m                        | 2.71 (dt, 15.9, 8.0)                          | 1.65 m                            | 1.49 m                                  | 1.40 m              | 2.55 m                                  | 2.58 m                           | 2.70 (ddt, 9.6,<br>6.6, 4.8)    |
| 16       | 1.21 m, 1.33 m                | 5.20 (t, 10.1)                                | 1.16 m, 1.24 m                    | 0.98 (tt, 9.2, 4.8),<br>1.38 m          | 0.98 m, 1.40 m      | 5.13 (t, 10.0)                          | 5.13 (t, 10.0)                   | 5.21 (t, 9.7)                   |
| 17       | 1.91 m, 1.94 m                | 6.05 (t, 11.0)                                | 1.95 m, 2.00 m                    | 1.91 m, 2.05 m                          | 1.92 m, 1.92 m      | 6.09 (t, 11.1)                          | 6.12 (t, 11.1)                   | 5.96 m                          |
| 18       | 5.10 (dddd, 8.7,              | 5.98 (d, 11.7)                                | 5.09 (tt, 7.0, 1.6)               | 5.10 m                                  | 5.10 m              | 6.00 (d, 11.6)                          | 6.03 (d, 12.1)                   | 5.47 (tt, 8.3, 1.5)             |

|    |                |               |               |               |               |               |               |               |
|----|----------------|---------------|---------------|---------------|---------------|---------------|---------------|---------------|
|    | 7.2, 2.9, 1.5) |               |               |               |               |               |               |               |
| 20 | 1.27 s         | 1.37 s        | 1.36 s        | 1.44 s        | 2.06 s        | 1.44 s        | 2.09 s        | 1.26 s        |
| 21 | 1.80 s         | 9.22 s        | 9.23 s        | 9.19 s        | 9.30 s        | 9.16 s        | 9.29 s        | 1.71 s        |
| 22 | 0.87 s         | 0.98 s        | 0.90 s        | 0.83 s        | 0.85 s        | 0.84 s        | 0.88 s        | 0.92 s        |
| 23 | 0.76 (d, 6.8)  | 0.92 (d, 6.6) | 0.78 (d, 6.8) | 0.89 (d, 6.5) | 0.89 (d, 6.5) | 0.97 (d, 6.7) | 0.99 (d, 6.7) | 0.87 (d, 6.7) |
| 24 | 1.60 s         | 1.75 s        | 1.60 s        | 1.60 s        | 1.60 s        | 1.76 s        | 1.79 s        | 1.77 s        |
| 25 | 1.68 s         | 1.82 s        | 1.69 s        | 1.69 s        | 1.69 s        | 1.82 s        | 1.85 s        | 1.80 s        |

**Table S5** <sup>13</sup>C NMR (100 MHz) data of compound **1-7** and **10** in CDCl<sub>3</sub> [1-3]

| Position | $\delta$ C |        |        |        |        |        |        |        |
|----------|------------|--------|--------|--------|--------|--------|--------|--------|
|          | 1          | 2      | 3      | 4      | 5      | 6      | 7      | 10     |
| 1        | 26.24      | 35.09  | 36.21  | 41.39  | 45.90  | 41.40  | 45.95  | 26.60  |
| 2        | 54.29      | 50.28  | 51.05  | 49.62  | 49.08  | 49.68  | 49.23  | 53.32  |
| 3        | 81.28      | 76.89  | 76.97  | 76.76  | 177.68 | 76.87  | 177.62 | 80.97  |
| 4        | 42.05      | 54.91  | 54.99  | 55.01  | 130.33 | 55.05  | 130.39 | 41.65  |
| 5        | 23.78      | 217.64 | 217.73 | 217.34 | 207.56 | 217.40 | 207.67 | 25.73  |
| 6        | 42.51      | 48.54  | 48.66  | 48.96  | 50.09  | 48.92  | 50.07  | 41.93  |
| 7        | 136.60     | 141.33 | 141.65 | 141.83 | 140.46 | 141.41 | 140.08 | 138.25 |
| 8        | 129.67     | 164.06 | 164.36 | 159.93 | 157.16 | 160.96 | 158.08 | 134.78 |
| 9        | 23.70      | 25.44  | 24.99  | 31.06  | 31.11  | 30.95  | 31.00  | 24.31  |
| 10       | 56.00      | 53.56  | 53.64  | 43.14  | 43.19  | 43.85  | 43.93  | 55.77  |
| 11       | 44.09      | 43.85  | 44.09  | 44.44  | 45.15  | 44.81  | 45.50  | 43.59  |
| 12       | 43.69      | 42.59  | 42.69  | 45.59  | 44.68  | 45.36  | 44.42  | 43.30  |
| 13       | 36.90      | 26.55  | 23.03  | 27.31  | 27.21  | 27.82  | 27.87  | 35.77  |
| 14       | 45.87      | 47.13  | 45.46  | 51.66  | 51.60  | 52.17  | 52.18  | 47.38  |
| 15       | 33.41      | 35.85  | 32.96  | 32.03  | 31.95  | 32.69  | 32.69  | 35.53  |
| 16       | 37.78      | 137.11 | 37.09  | 37.00  | 37.30  | 135.70 | 135.81 | 121.55 |
| 17       | 26.71      | 122.44 | 26.20  | 25.87  | 25.83  | 124.09 | 124.13 | 120.54 |
| 18       | 125.46     | 119.95 | 124.65 | 124.57 | 124.51 | 120.08 | 120.08 | 129.02 |
| 19       | 131.58     | 136.06 | 131.58 | 131.69 | 131.72 | 136.57 | 136.65 | 136.02 |
| 20       | 29.49      | 25.67  | 25.68  | 25.92  | 17.36  | 25.99  | 17.34  | 29.05  |
| 21       | 21.97      | 196.28 | 196.49 | 194.45 | 193.17 | 194.43 | 193.13 | 21.58  |
| 22       | 19.25      | 18.73  | 19.18  | 23.56  | 23.19  | 23.43  | 23.04  | 20.54  |
| 23       | 17.39      | 20.42  | 16.68  | 18.75  | 18.72  | 21.43  | 21.35  | 18.22  |
| 24       | 18.14      | 18.15  | 17.80  | 17.84  | 17.83  | 18.34  | 18.32  | 18.59  |
| 25       | 26.31      | 26.55  | 25.87  | 25.83  | 25.88  | 26.69  | 26.65  | 26.63  |

**Table S6** Plasmids used in this study

| Plasmids                       | Features                                                                             |
|--------------------------------|--------------------------------------------------------------------------------------|
| pGAPZ $\alpha$ A               | <i>ble<sup>r</sup></i> selection marker                                              |
| pCAMBIA1301                    | <i>hph</i> selection marker; CAMV35S promoter                                        |
| pTAex3-rev-1022                | <i>argB</i> auxotrophic gene; $\alpha$ -amylase promoter and terminator              |
| pAdeA-R                        | <i>adeA</i> auxotrophic gene                                                         |
| peGFP-C1                       | <i>kan<sup>r</sup></i> and <i>neo<sup>r</sup></i> selection marker; <i>egfp</i> gene |
| pMD19T- <i>sh ble</i>          | Introducing <i>Spe</i> and <i>Clal</i> into multiple cloning sites of pMD19T         |
| pMD19T- <i>oblAL-hph-oblAR</i> | <i>oblA</i> gene-targeting cassette inserted into <i>XbaI</i> and <i>EcoRI</i>       |
| pMD19T- <i>oblBL-hph-oblBR</i> | <i>oblB</i> gene-targeting cassette inserted into <i>SpeI</i> and <i>EcoRI</i>       |
| pMD19T- <i>oblCL-hph-oblCR</i> | <i>oblC</i> gene-targeting cassette inserted into <i>Hind III</i> and <i>EcoRI</i>   |
| pMD19T- <i>oblDL-hph-oblDR</i> | <i>oblD</i> gene-targeting cassette inserted into <i>KpnI</i> and <i>EcoRI</i>       |
| pMD19T- <i>oblRL-hph-oblRR</i> | <i>oblR</i> gene-targeting cassette inserted into <i>SpeI</i> and <i>EcoRI</i>       |
| pTAex3- <i>oblA</i>            | <i>oblA</i> was introduced into between Pamy and Tamy                                |



---

|                          |                                                                                                    |
|--------------------------|----------------------------------------------------------------------------------------------------|
| pAdeA- <i>oblB</i>       | Introducing gene-expression cassette Pamy- <i>oblB</i> -Tamy                                       |
| pAdeA- <i>oblC</i>       | Introducing gene-expression cassette Pamy- <i>oblC</i> -Tamy                                       |
| pAdeA- <i>oblD</i>       | Introducing gene-expression cassette Pamy- <i>oblD</i> -Tamy                                       |
| pTAex3- <i>oblA-oblB</i> | Introducing gene-expression cassette Pamy- <i>oblB</i> -T <sub>oblB</sub> -Pamy- <i>oblA</i> -Tamy |
| pAdeA- <i>oblC-oblD</i>  | Introducing gene-expression cassette Pamy- <i>oblC</i> -T <sub>oblC</sub> -Pamy- <i>oblD</i> -Tamy |
| pTAex3-eGFP              | <i>egfp</i> inserted into site of <i>EcoR</i> I                                                    |
| pTAex3-eGFP <i>oblA</i>  | <i>egfp-oblA</i> inserted into site of <i>EcoR</i> I                                               |
| pTAex3-eGFP <i>oblB</i>  | <i>egfp-oblB</i> inserted into site of <i>EcoR</i> I                                               |
| pTAex3-eGFP <i>oblC</i>  | <i>egfp-oblC</i> inserted into site of <i>EcoR</i> I                                               |
| pTAex3-eGFP <i>oblD</i>  | <i>egfp-oblD</i> inserted into site of <i>EcoR</i> I                                               |

---

## Supplementary figures

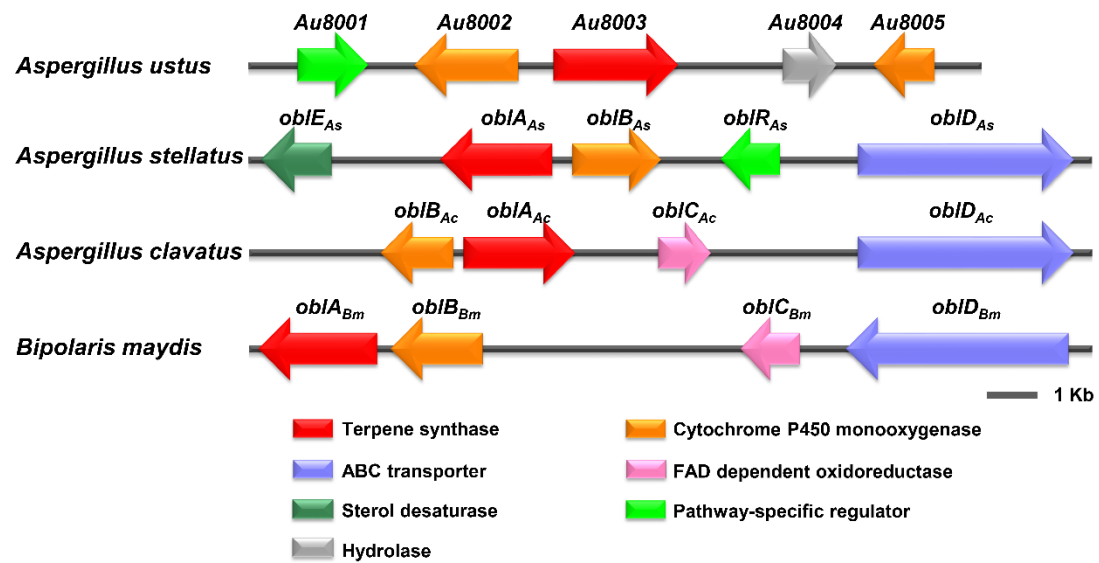

**Figure S1** *obl* gene cluster from *A. ustus*, *A. stellatus*, *A. clavatus* and *Bipolaris maydis* [4, 5]

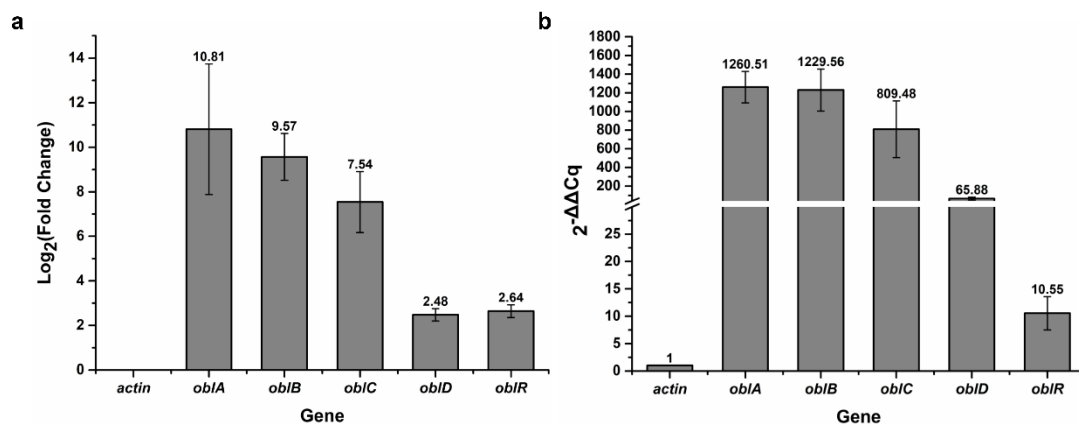

**Figure S2** Gene expression level analysis of *oblA<sub>Au</sub>-D<sub>Au</sub>* and *oblR<sub>Au</sub>* by RNA-Seq (a) and RT-qPCR (b).  $\text{Log}_2(\text{Fold Change})$  and  $2^{-\Delta\Delta Cq}$  were calculated according to the expression ratio of each gene. The housekeeping gene *actin* was used for normalization. Data are means  $\pm$  SE of three independent measurements.

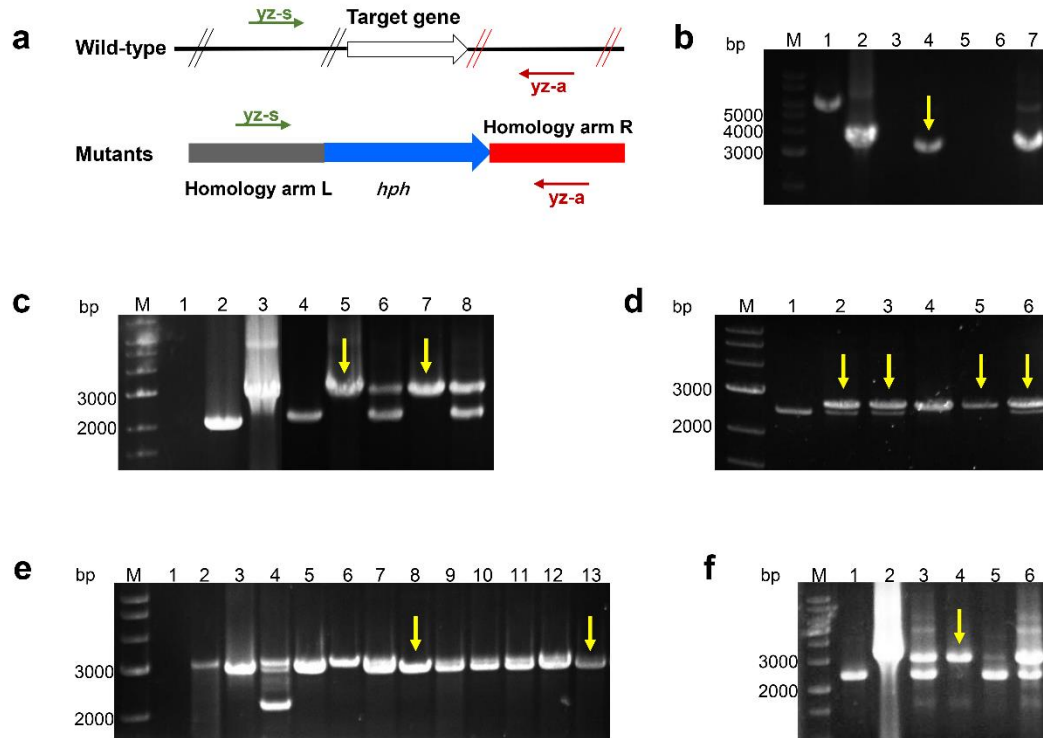

**Figure S3** Screening of mutants. (a) The schematic diagram of screening of wild-type and mutants using primers yz-s/a. (b) PCR verification of  $\Delta oblD$  transformants with primers *oblD*-yz-s/a. Lane 1: wild-type strain (5478 bp); lane 2: pMD19T-*oblDL-hph-oblDR* (3205 bp); lane 3: blank control; lane 4-7: four transformants. (c) PCR verification of  $\Delta oblR$  transformants with primers *oblR*-yz-s/a. Lane 1: blank control; lane 2: wild-type strain (1999 bp); lane 2: pMD19T-*oblRL-hph-oblRR* (2805 bp); lane 4-8: five transformants. (d) PCR verification of  $\Delta oblB$  transformants with primers *oblB*-yz-s/a. Lane 1: wild-type strain (2508 bp); lane 4: pMD19T-*oblBL-hph-oblBR* (2718 bp); lane 2-3 and 5-6: four transformants. (e) PCR verification of  $\Delta oblA$  transformants with primers *oblA*-yz-s/a. Lane 1: blank control; lane 2: wild-type strain (3110 bp); lane 3: pMD19T-*oblAL-hph-oblAR* (2906 bp); lane 4-13: ten transformants. (f) PCR verification of  $\Delta oblC$  transformants with primers *oblC*-yz-s/a. Lane 1: wild-type strain (2406 bp); lane 2: pMD19T-*oblCL-hph-oblCR* (3103 bp); lane 3-6: four transformants. M: 1 kb DNA ladder; the yellow arrows indicate positive mutants.

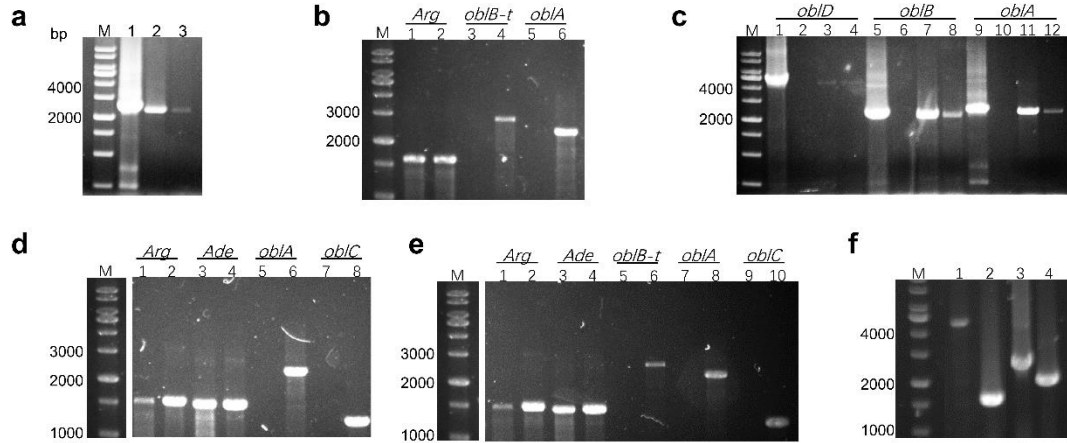

**Figure S4** PCR verification of heterologous expression strains. (a) Ao-*oblA*. Lane 1, 2 and 3: *oblA* gene amplified from plasmid of pTAex3-*oblA*, gDNA of Ao-*oblA*-1 and gDNA of Ao-*oblA*-2, respectively; (b) Ao-*oblA-oblB*. Lane 1, 3 and 5: gDNA of Ao-pTAex3; Lane 2, 4 and 6: gDNA of Ao-*oblA-oblB*; (c) Ao-*oblA-oblB-oblD*. Lane 1: plasmid of pAdeA-*oblD*; Lane 5 and 9: plasmid of pTAex3-*oblA-oblB*; Lane 2, 6 and 10: gDNA of Ao-pTAex3-pAdeA; Lane 3, 7 and 11: gDNA of Ao-*oblA-oblB-oblD*-1; Lane 4, 8 and 12: gDNA of Ao-*oblA-oblB-oblD*-2. (d) Ao-*oblA-oblC*. Lane 1, 3, 5 and 7: gDNA of Ao-pTAex3-pAdeA; Lane 2, 4, 6 and 8: gDNA of Ao-*oblA-oblC*; (e) Ao-*oblA-oblB-oblC*. Lane 1, 3, 5, 7 and 9: gDNA of Ao-pTAex3-pAdeA; Lane 2, 4, 6, 8 and 10: gDNA of Ao-*oblA-oblB-oblC*; (f) Ao-*oblA-oblB-oblC-oblD*. Lane 1, 2, 3 and 4: *oblD*, *oblC*, *oblB-t* and *oblA* gene amplified from gDNA of Ao-*oblA-oblB-oblC-oblD*, respectively. M: 1 kb DNA ladder.

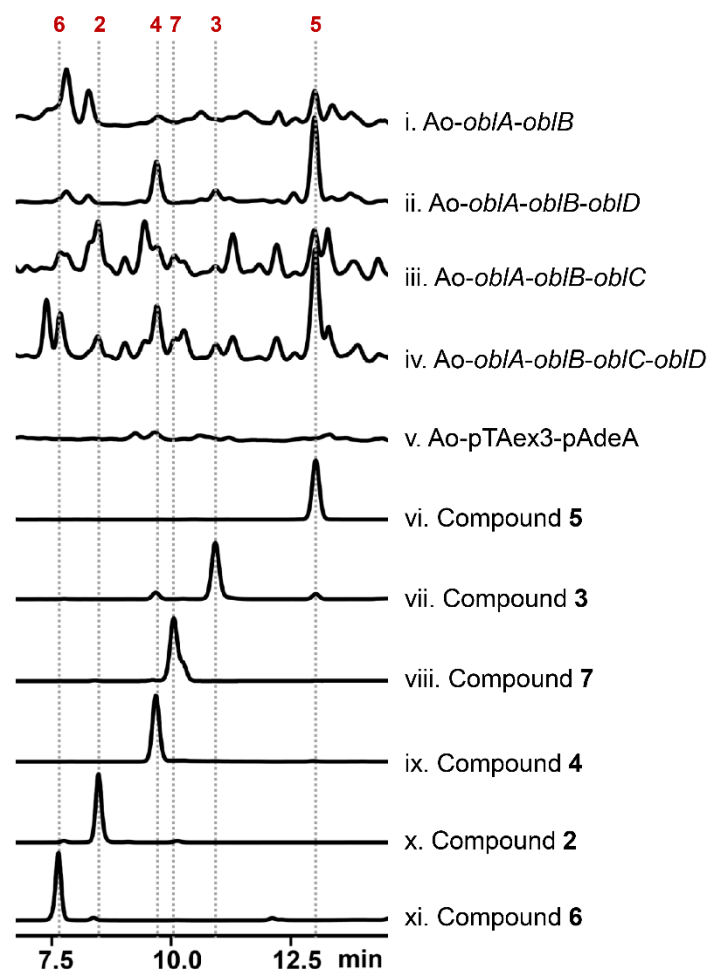

**Figure S5** HPLC analysis of crude extracts from *A. oryzae* expressing *oblA<sub>Au</sub>-D<sub>Au</sub>*

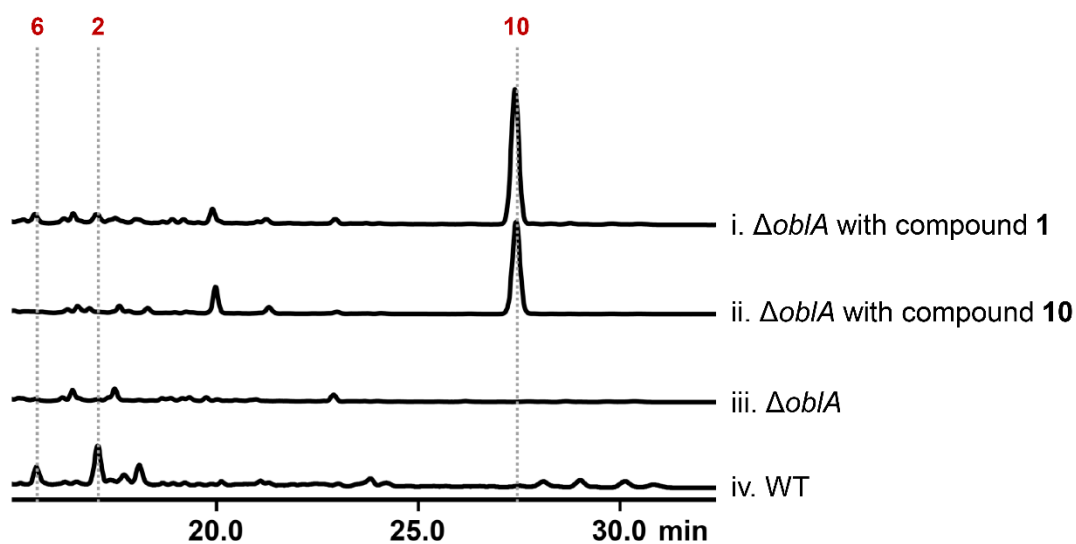

**Figure S6** HPLC analysis of cultural extracts of mutants  $\Delta oblA_{Au}$  fed with compound **1** and **10**

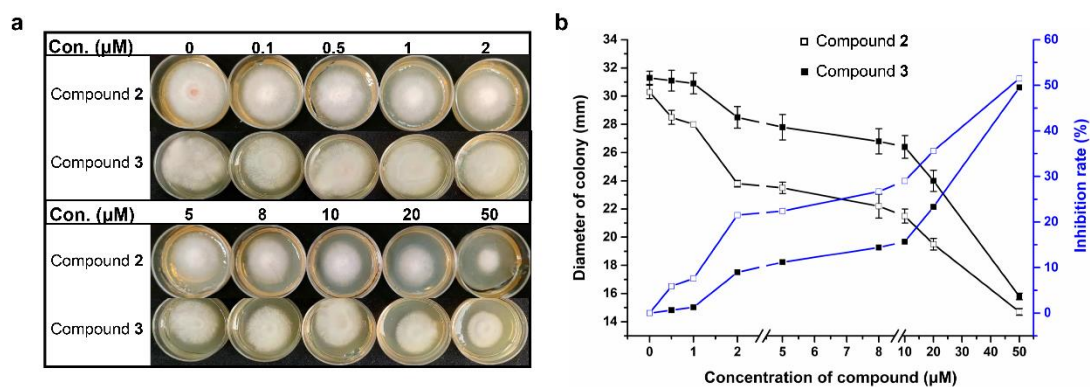

**Figure S7** The inhibition test of 0-50  $\mu\text{M}$  of compound 2 and 3 on *A. oryzae*. (a) The colony of *A. oryzae* growing in CD medium with 0-50  $\mu\text{M}$  of compound 2 and 3, respectively. (b) The diameter of colony of *A. oryzae* on CD medium with 0-50  $\mu\text{M}$  of compound 2 and 3 and inhibition rate of 0-50  $\mu\text{M}$  of compound 2 and 3 against *A. oryzae*, respectively.

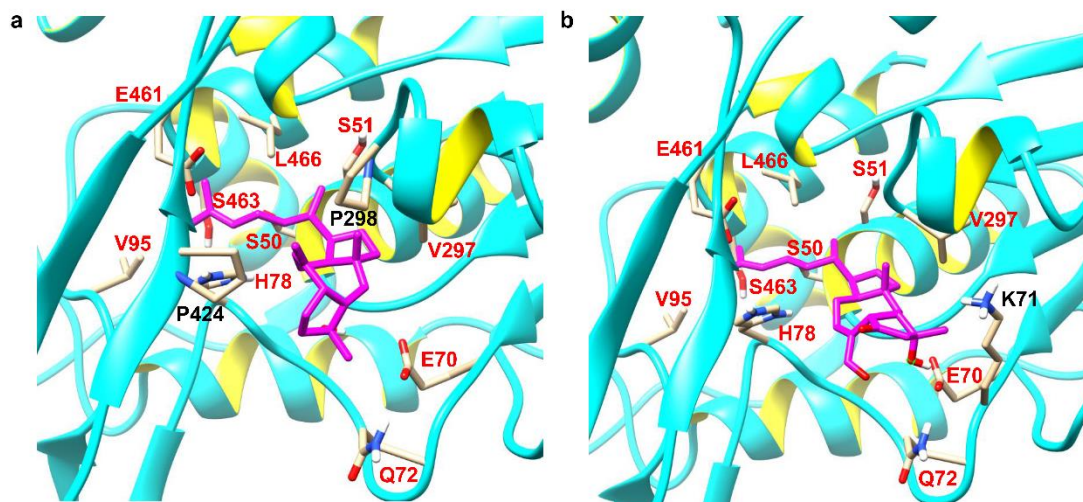

**Figure S8** Docking of the modelled ObIC with different substrates. (a) Docking of ObIC with compound 1 (as sticks in lavender). The residues (S50, S51, E70, Q72, H78, V95, V297, V298, P424, E461, S463 and L466) are shown as sticks. (b) Docking of ObIC with compound 3 (as sticks in lavender). The residues (S50, S51, E70, K71, Q72, H78, V95, V297, E461, S463 and L466) are shown as sticks. The residues in red are consensus residues in both models.

## Supplementary NMR and HR-ES spectra

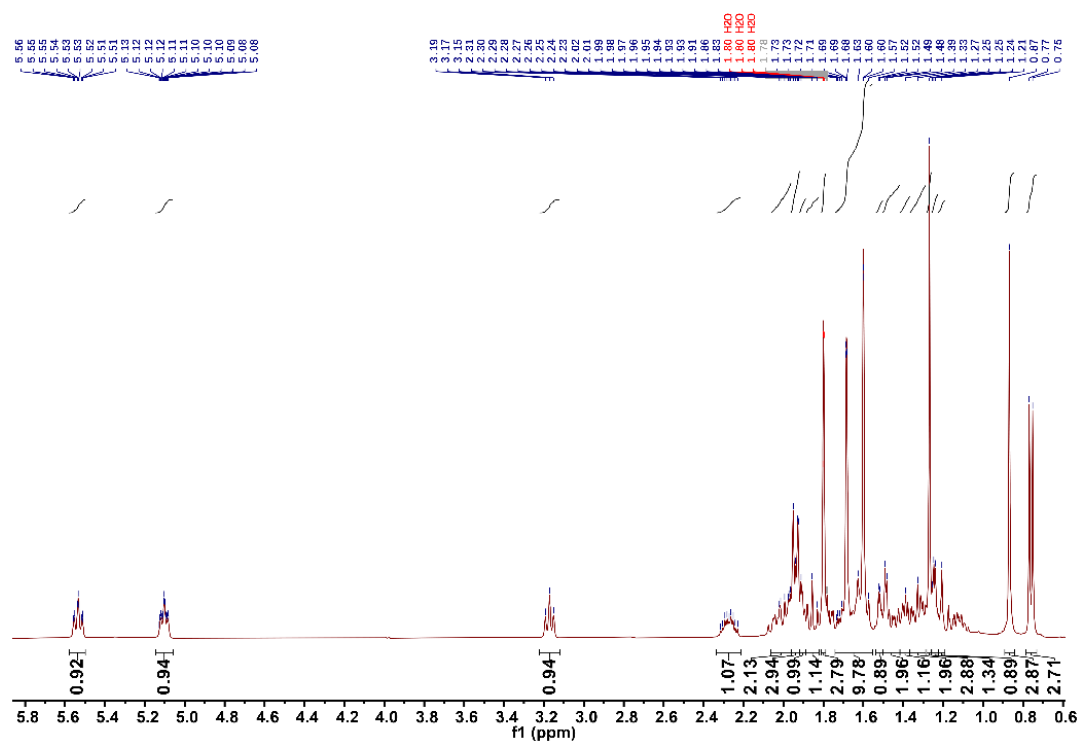

Figure S9 <sup>1</sup>H NMR spectrum of compound **1** (400 MHz, CDCl<sub>3</sub>)

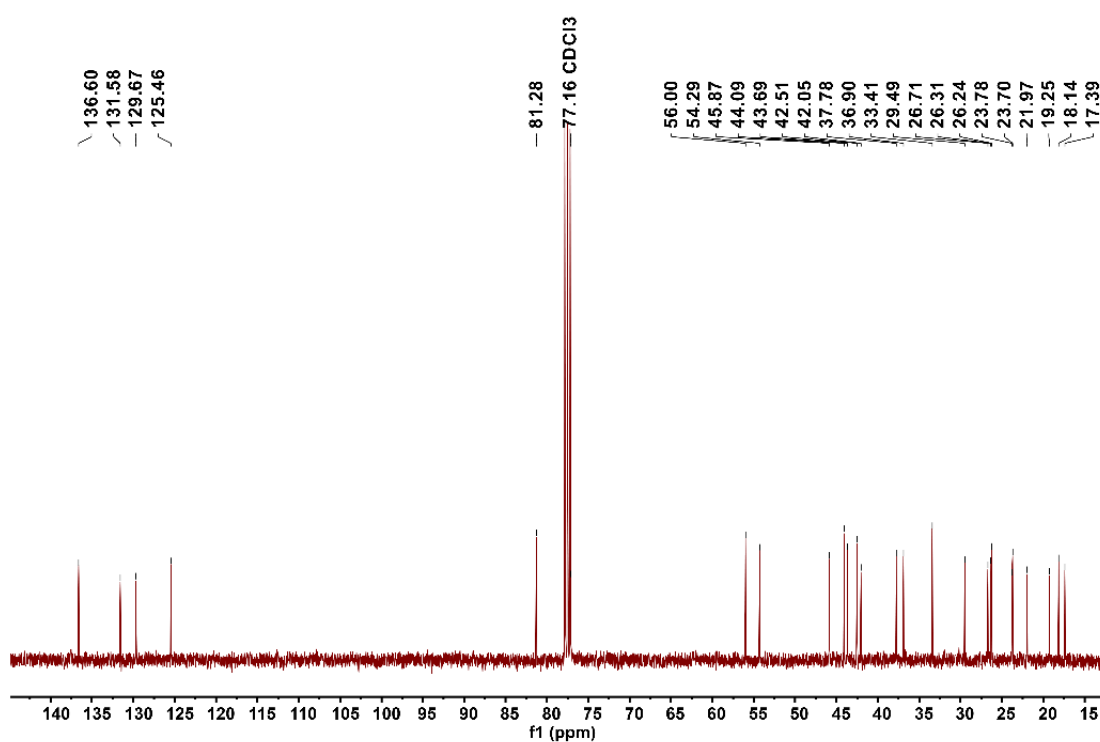

Figure S10 <sup>13</sup>C NMR spectrum of compound **1** (100 MHz, CDCl<sub>3</sub>)

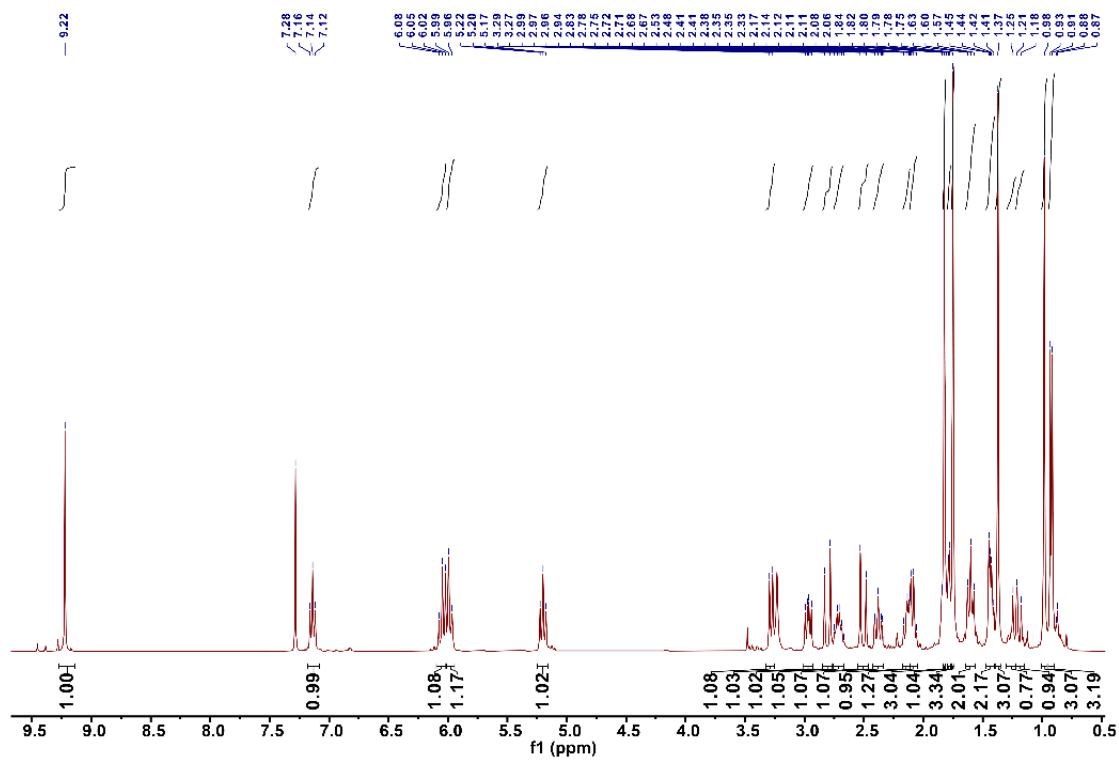

Figure S11 <sup>1</sup>H NMR spectrum of compound 2 (400 MHz, CDCl<sub>3</sub>)

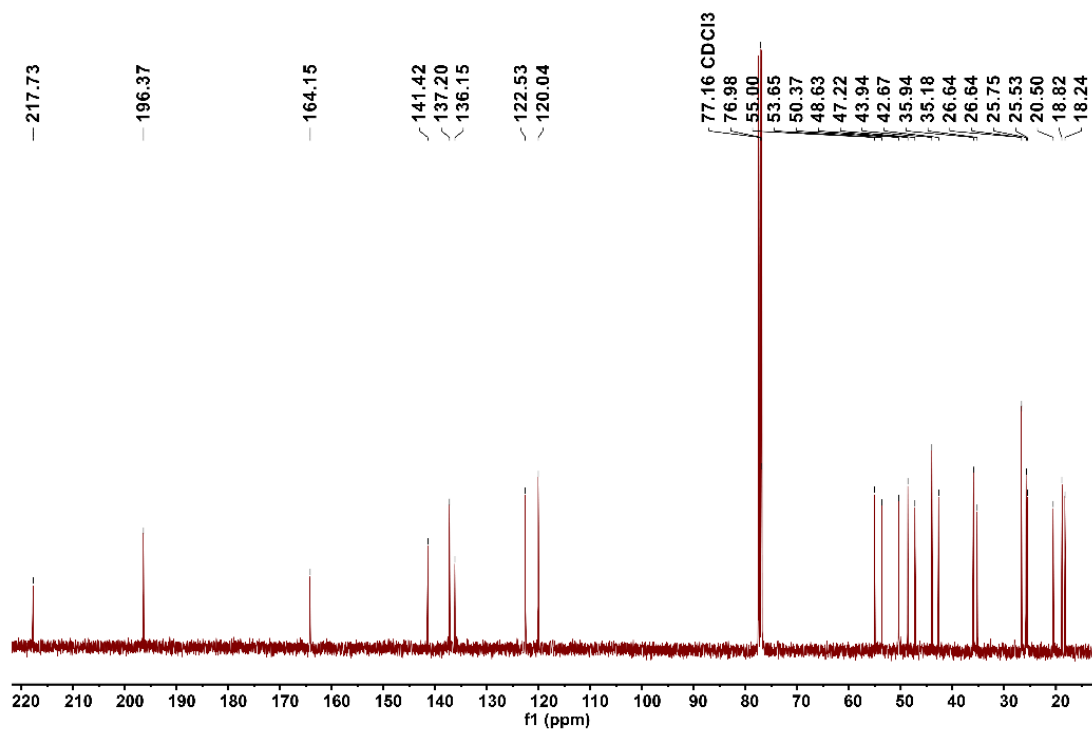

Figure S12 <sup>13</sup>C NMR spectrum of compound 2 (100 MHz, CDCl<sub>3</sub>)



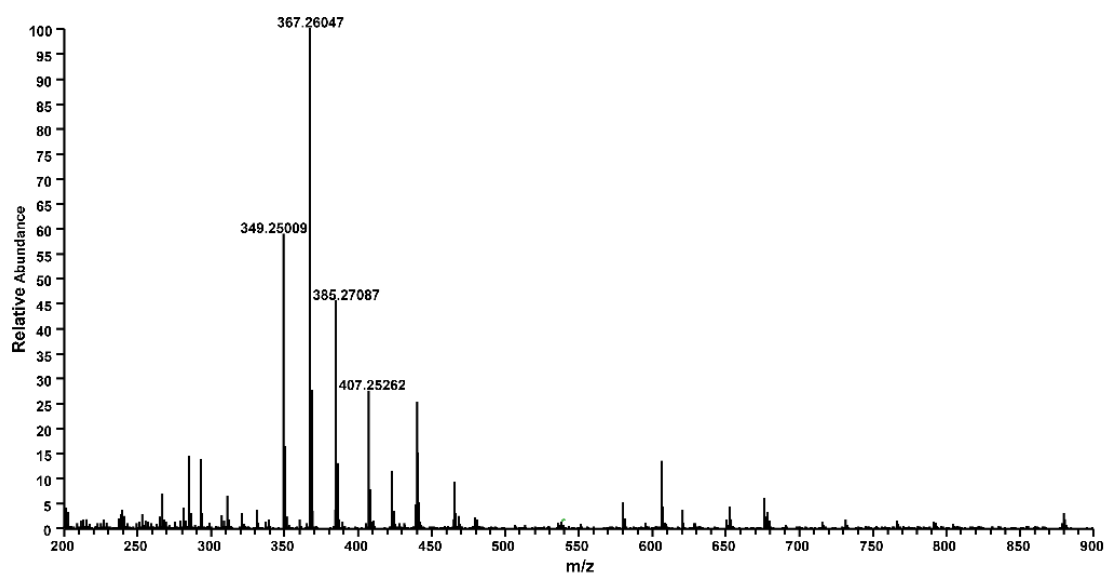

Figure S13 ESI-HRMS spectrum of compound 2

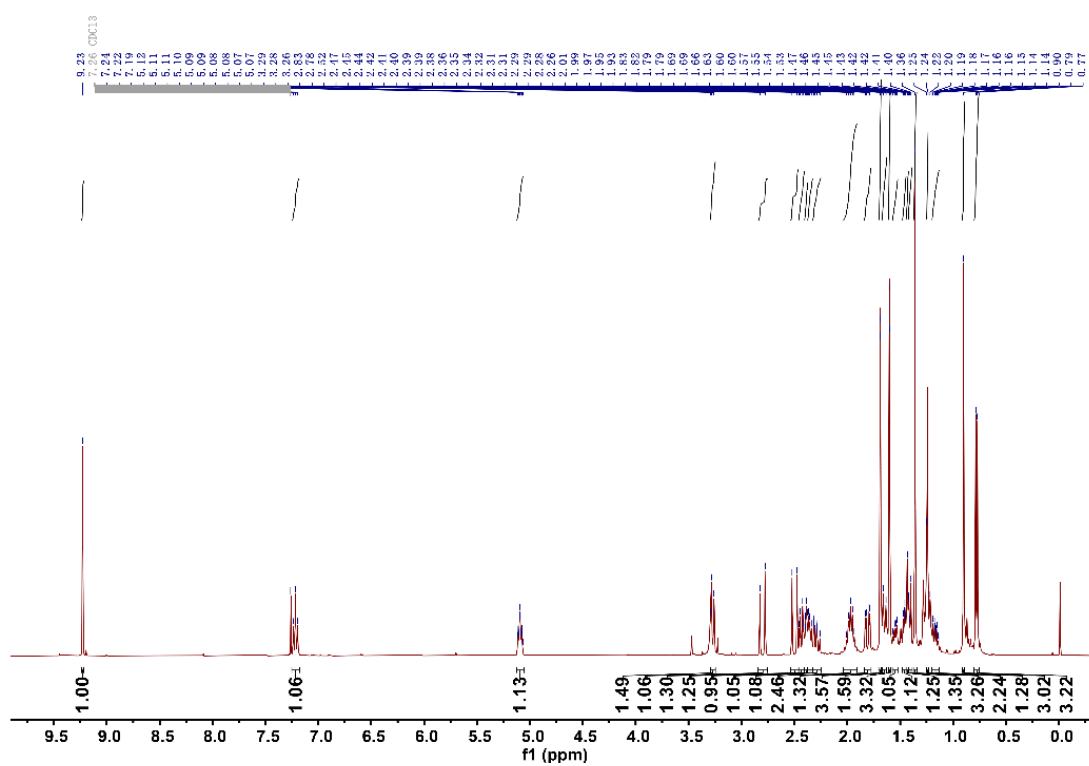

Figure S14 <sup>1</sup>H NMR spectrum of compound 3 (400 MHz, CDCl<sub>3</sub>)

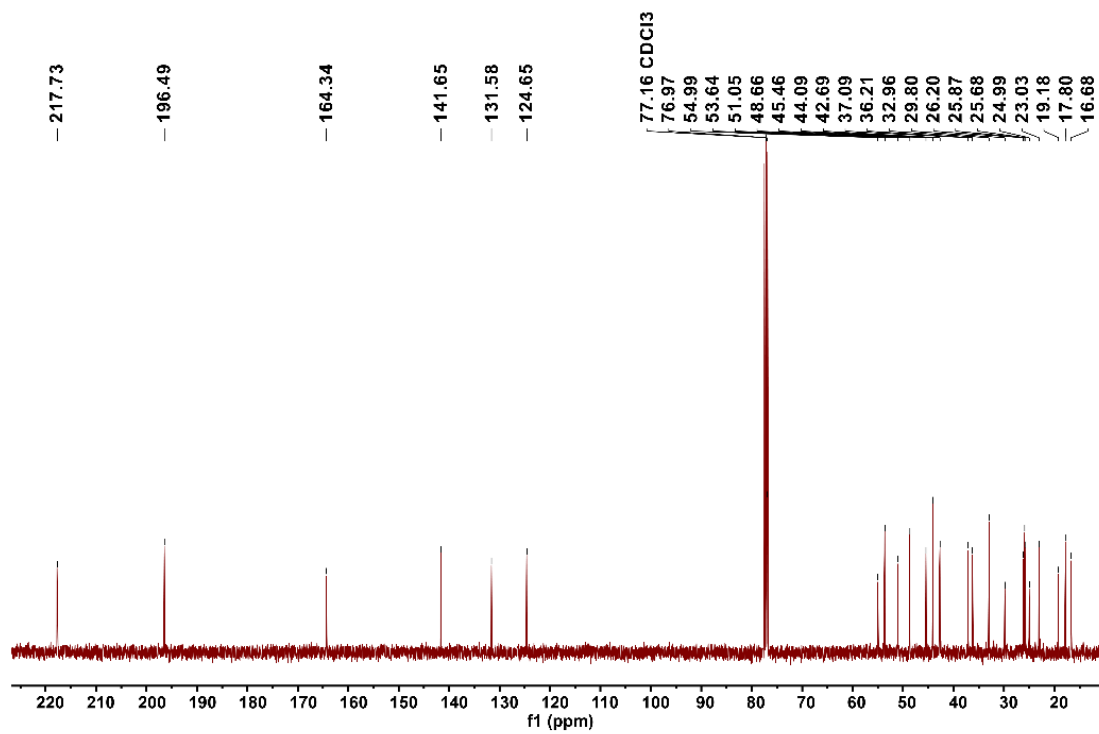

Figure S15  $^{13}\text{C}$  NMR spectrum of compound 3 (100 MHz,  $\text{CDCl}_3$ )

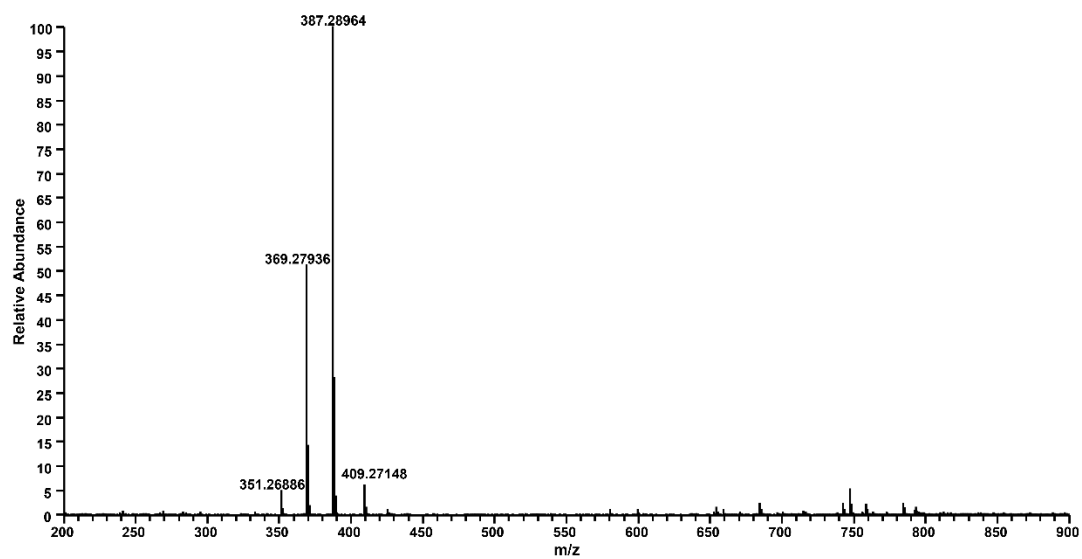

Figure S16 ESI-HRMS spectrum of compound 3

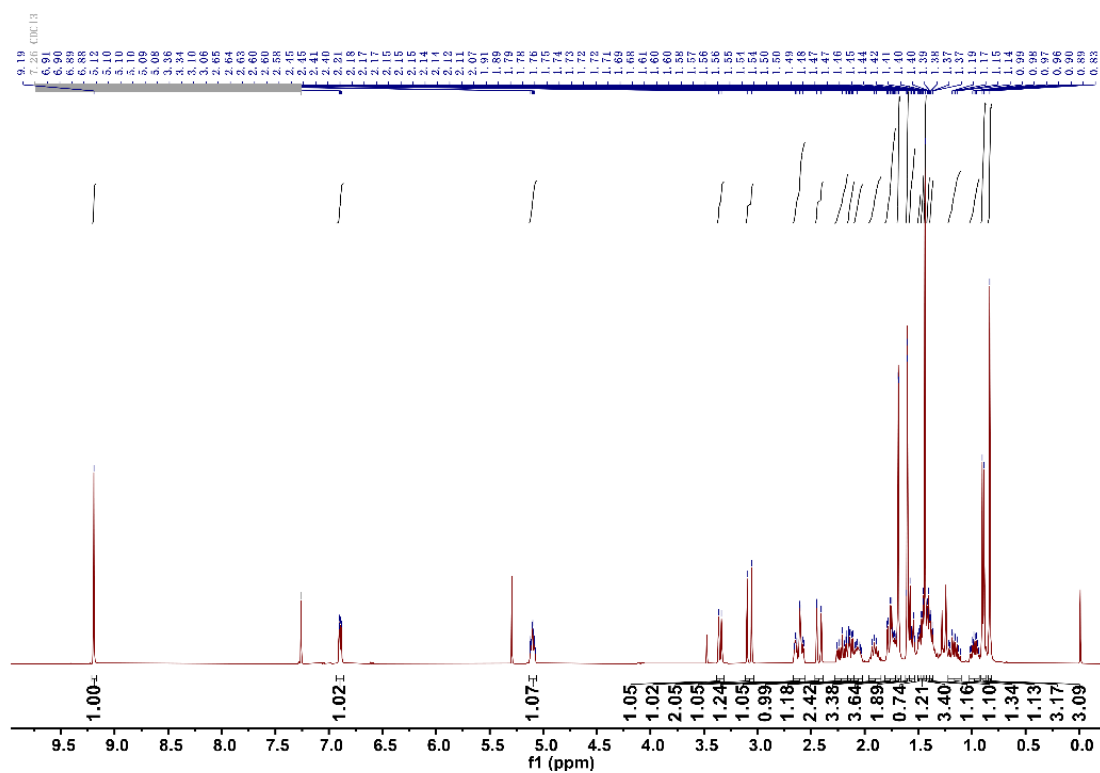

Figure S17 <sup>1</sup>H NMR spectrum of compound 4 (400 MHz, CDCl<sub>3</sub>)

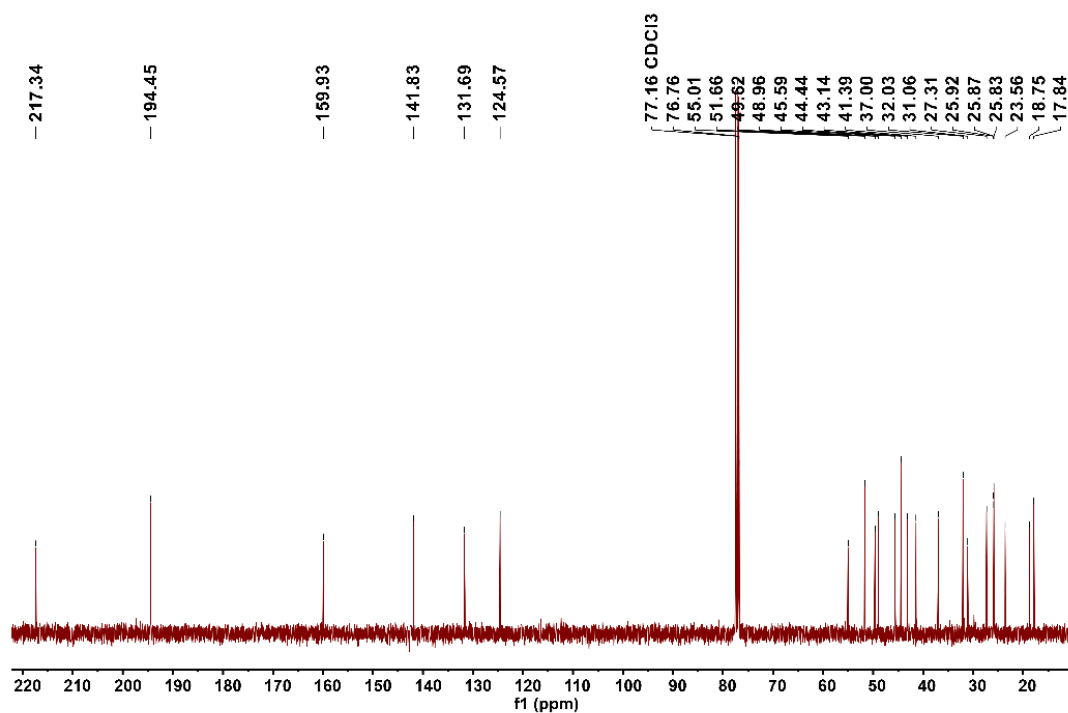

Figure S18 <sup>13</sup>C NMR spectrum of compound 4 (100 MHz, CDCl<sub>3</sub>)

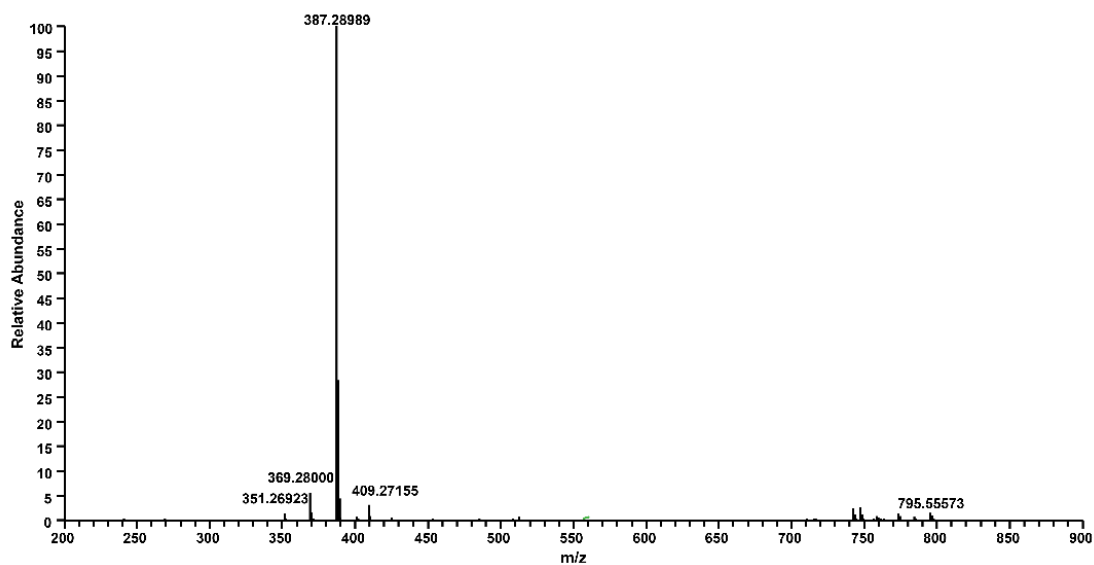

Figure S19 ESI-HRMS spectrum of compound 4

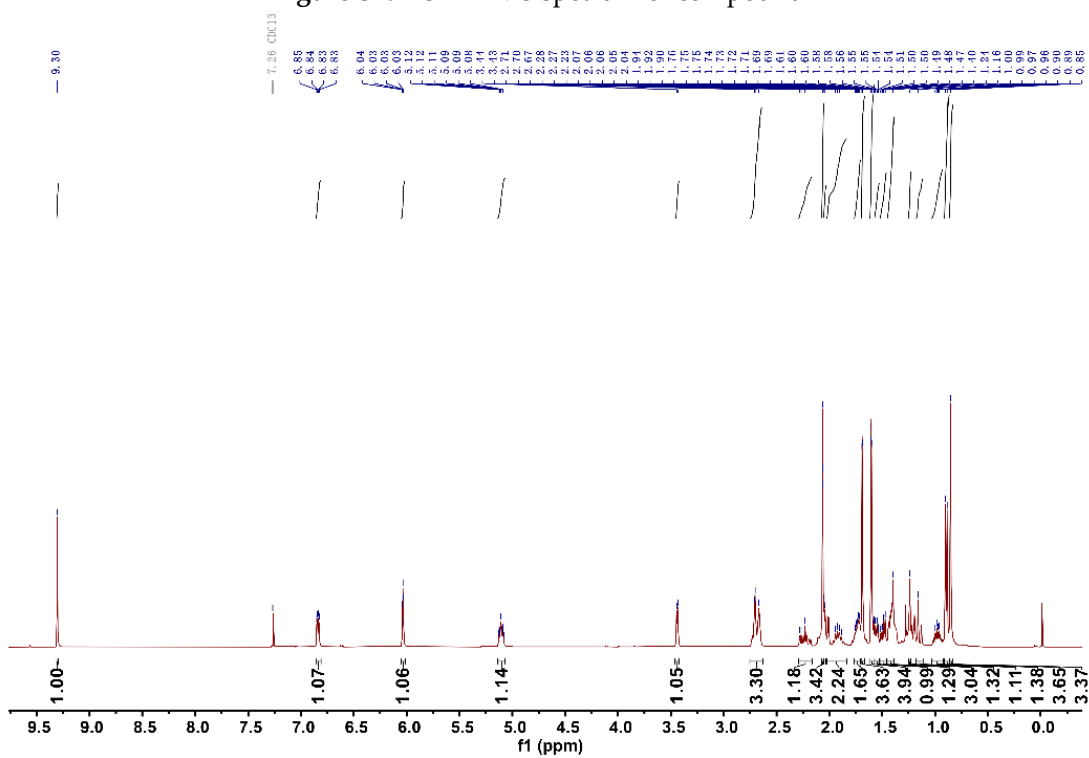

Figure S20  $^1\text{H}$  NMR spectrum of compound 5 (400 MHz,  $\text{CDCl}_3$ )

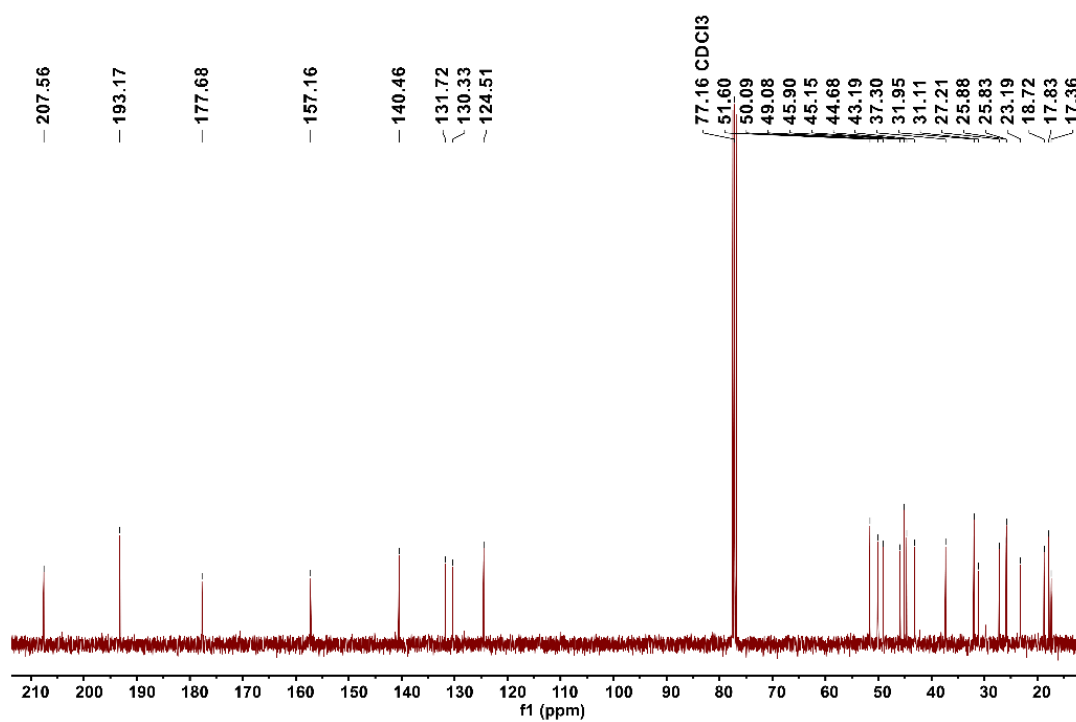

Figure S21 <sup>13</sup>C NMR spectrum of compound 5 (100 MHz, CDCl<sub>3</sub>)

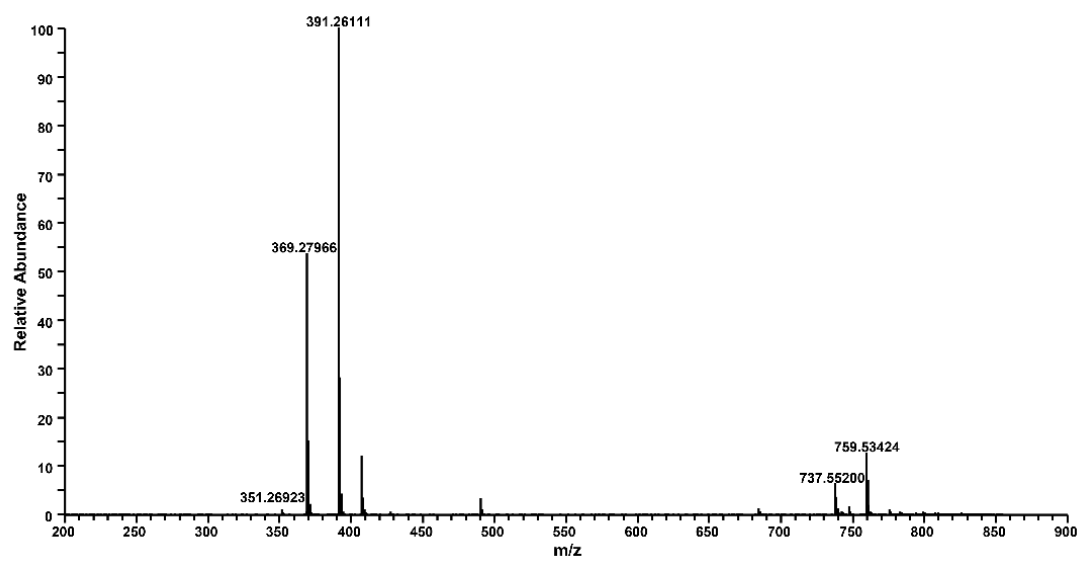

Figure S22 ESI-HRMS spectrum of compound 5

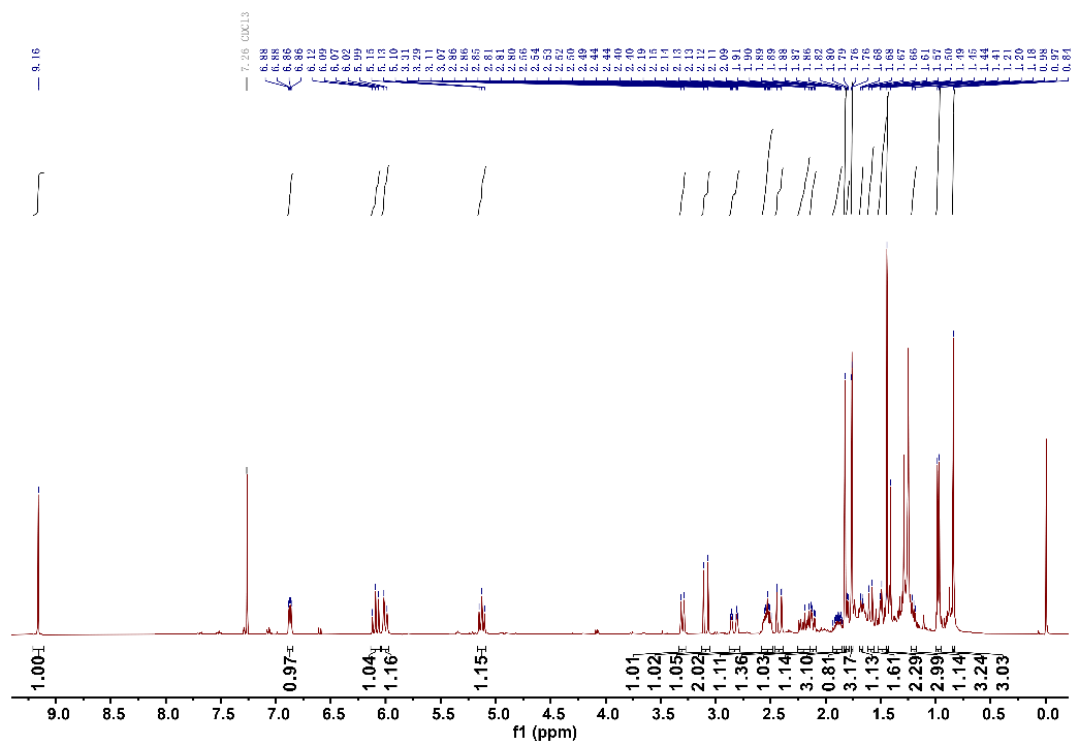

Figure S23 <sup>1</sup>H NMR spectrum of compound 6 (400 MHz, CDCl<sub>3</sub>)

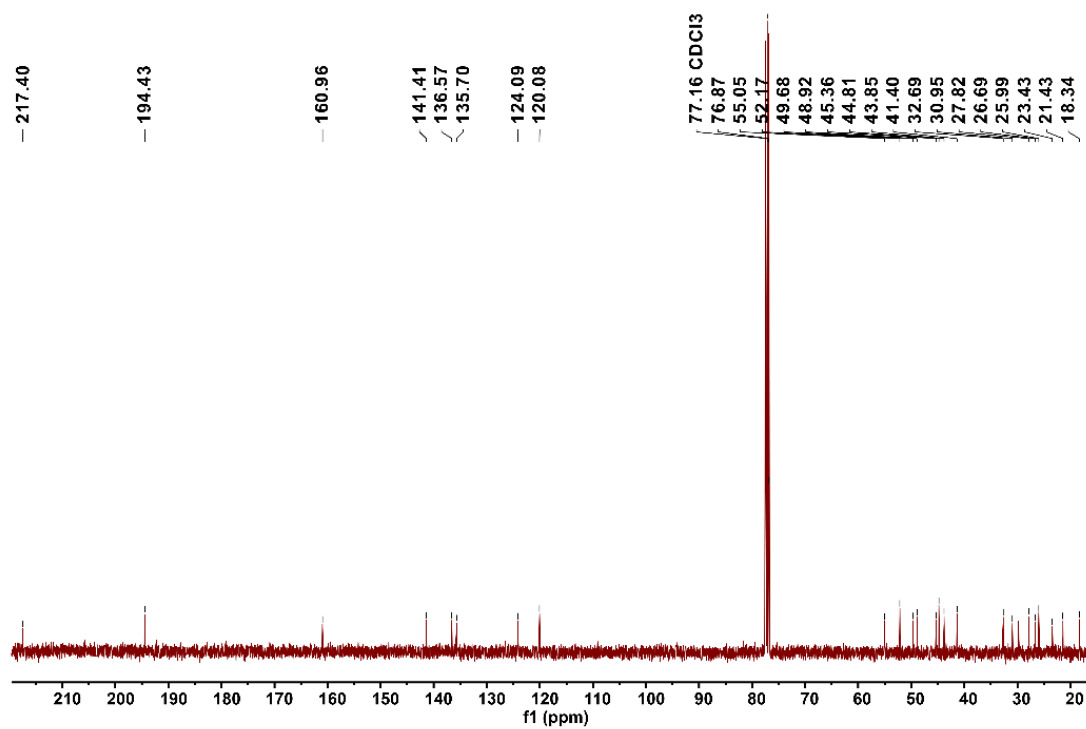

Figure S24 <sup>13</sup>C NMR spectrum of compound 6 (100 MHz, CDCl<sub>3</sub>)

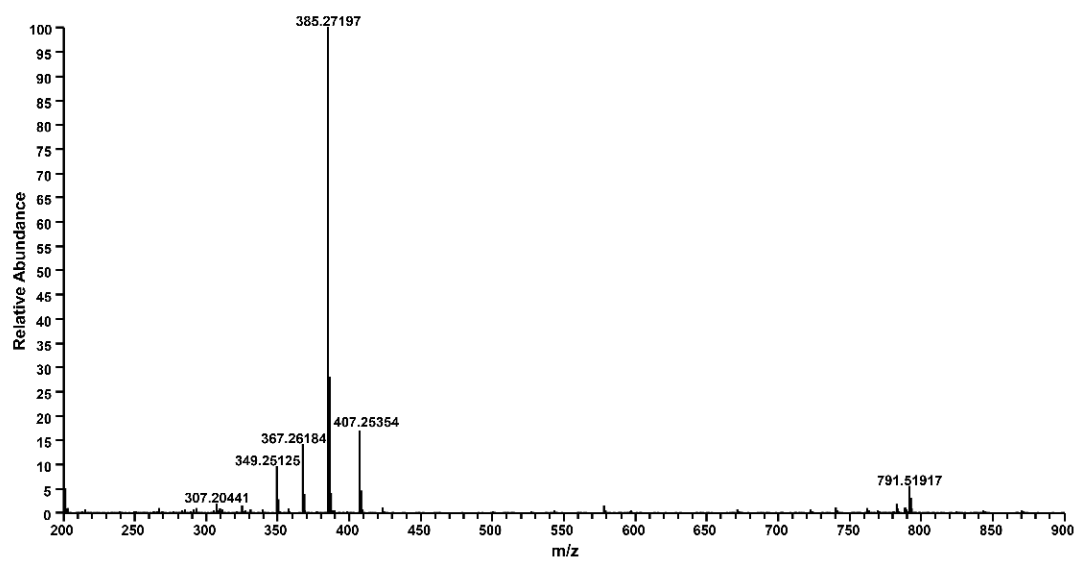

Figure S25 ESI-HRMS spectrum of compound 6

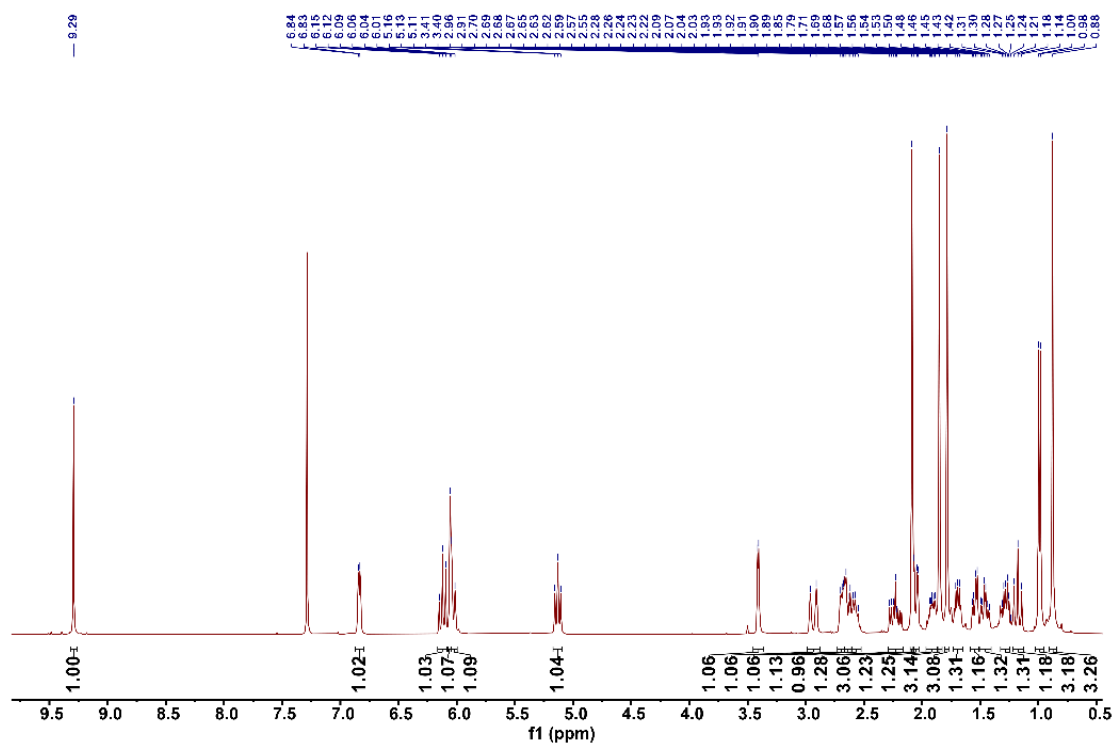

Figure S26 <sup>1</sup>H NMR spectrum of compound 7 (400 MHz, CDCl<sub>3</sub>)

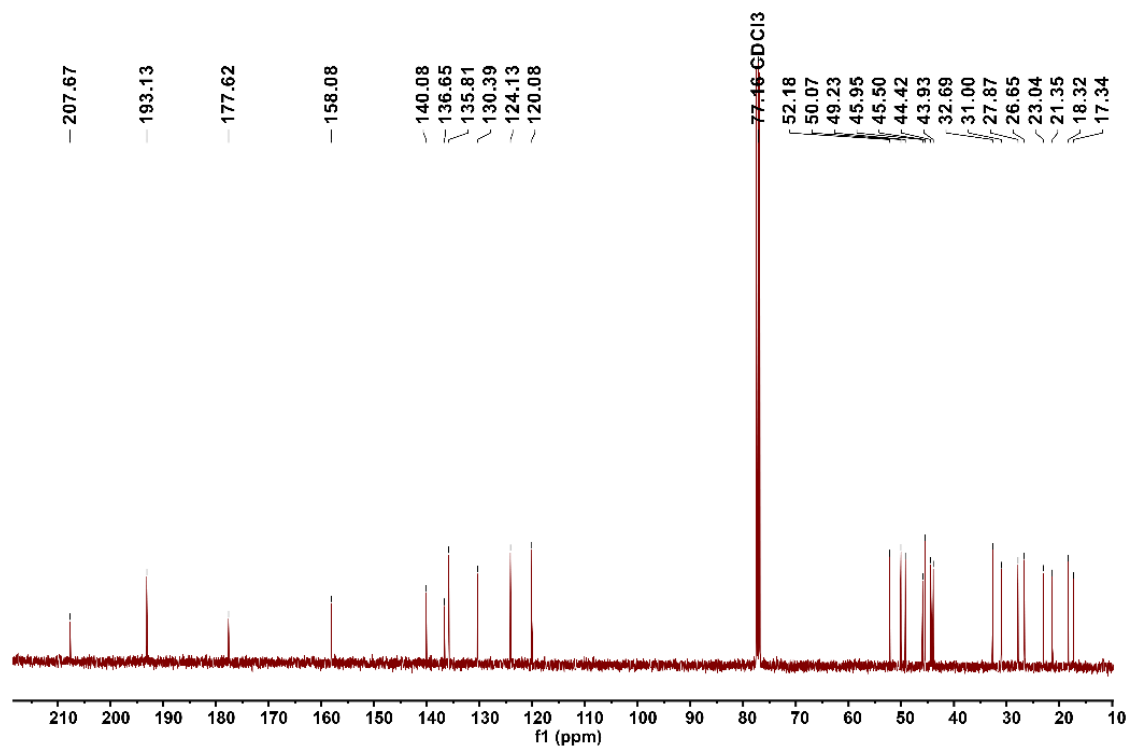

Figure S27 <sup>13</sup>C NMR spectrum of compound 7 (100 MHz, CDCl<sub>3</sub>)

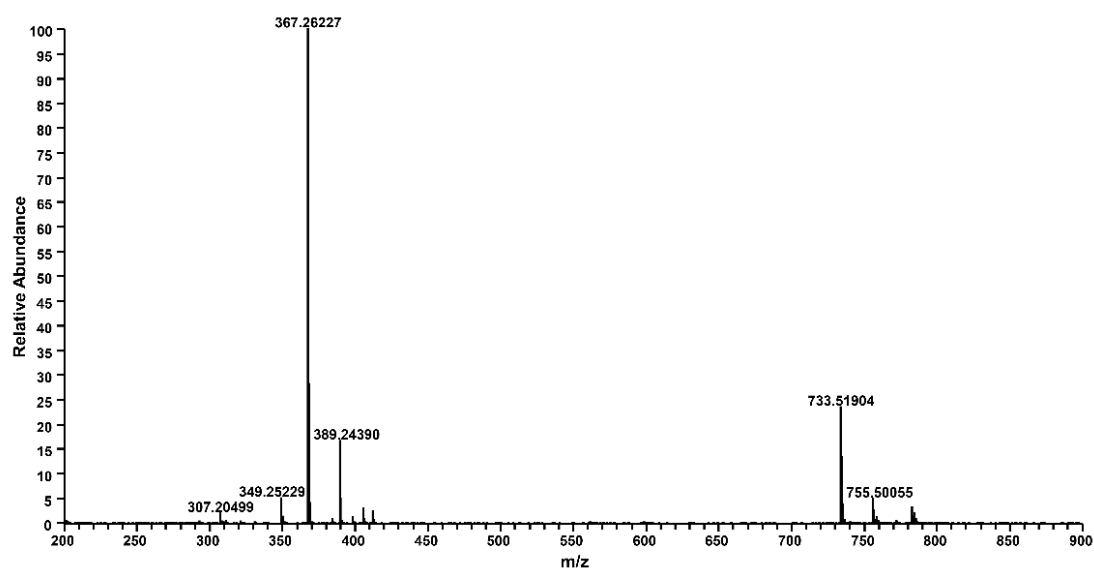

Figure S28 ESI-HRMS spectrum of compound 7



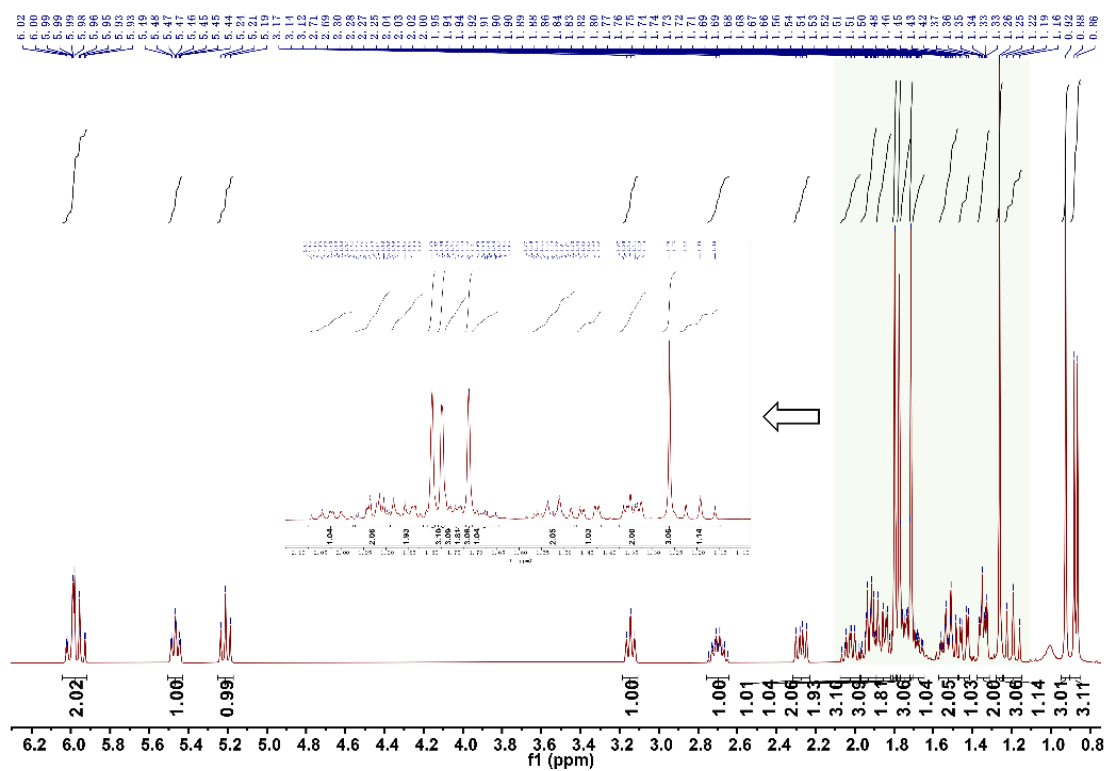

Figure S29  $^1\text{H}$  NMR spectrum of compound **10** (400 MHz,  $\text{CDCl}_3$ )

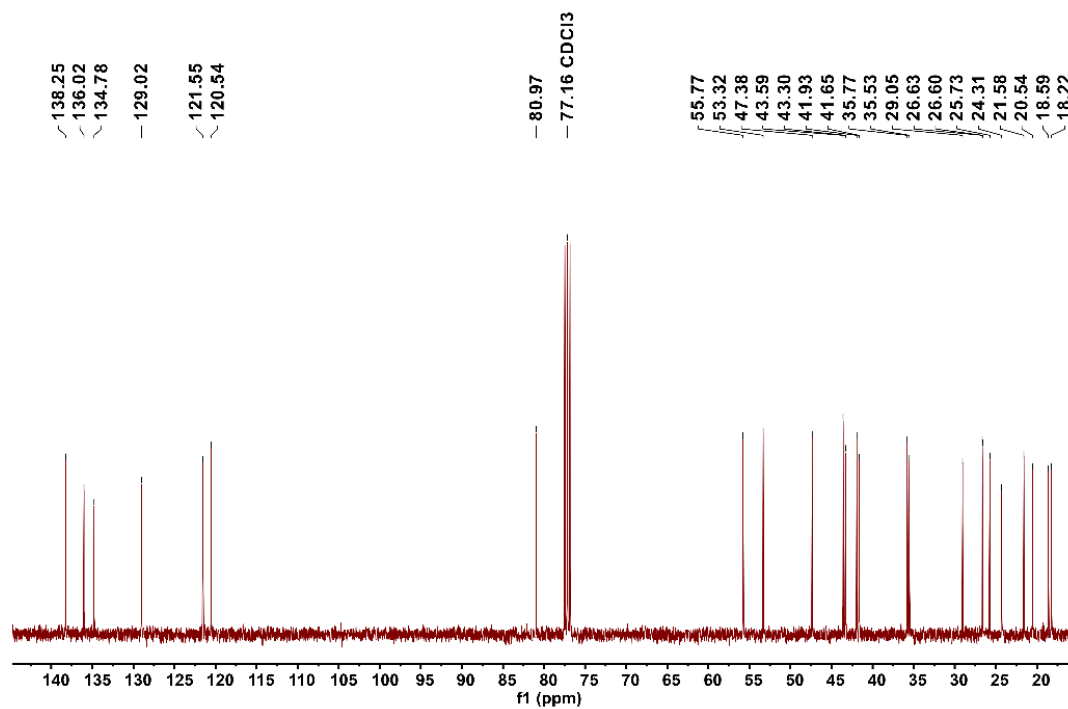

Figure S30  $^{13}\text{C}$  NMR spectrum of compound **10** (100 MHz,  $\text{CDCl}_3$ )

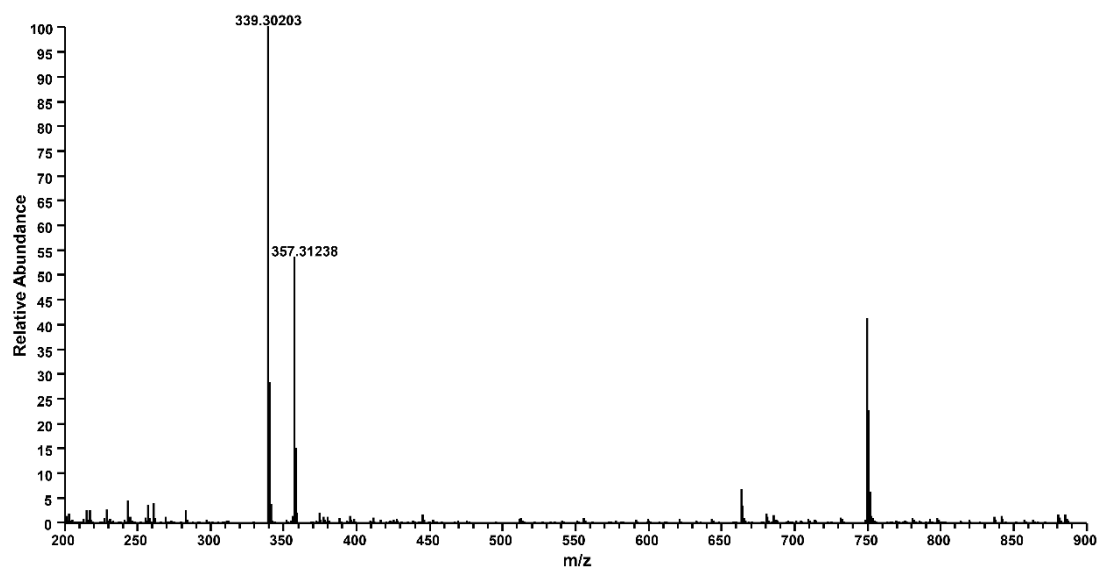

Figure S31 ESI-HRMS spectrum of compound 10

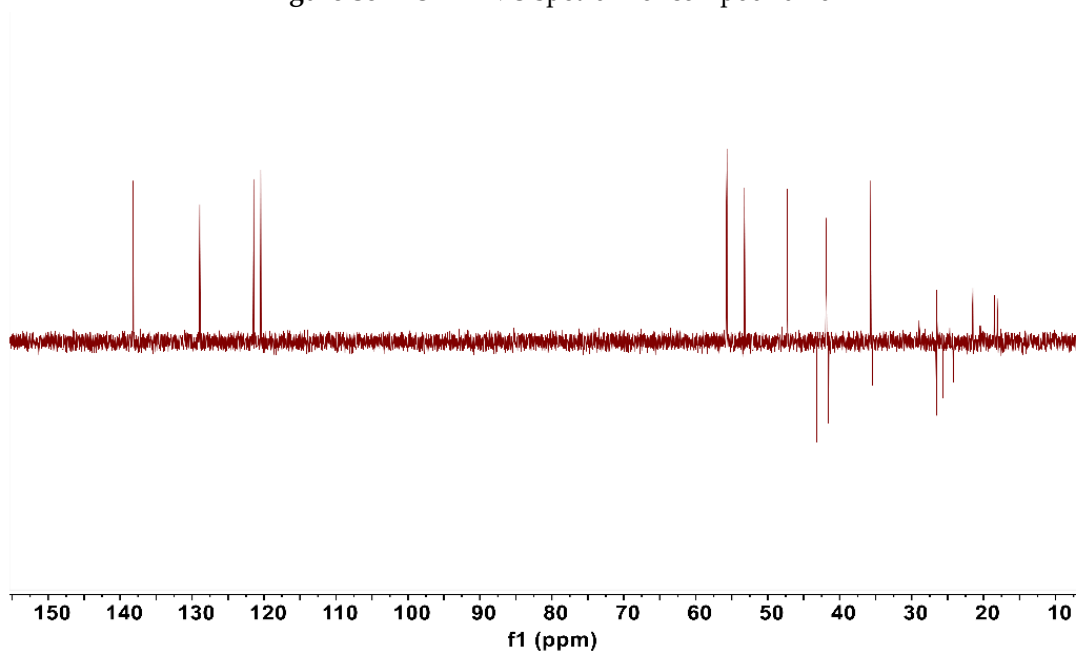

Figure S32 DEPT135 of compound 10 (100 MHz, CDCl<sub>3</sub>)

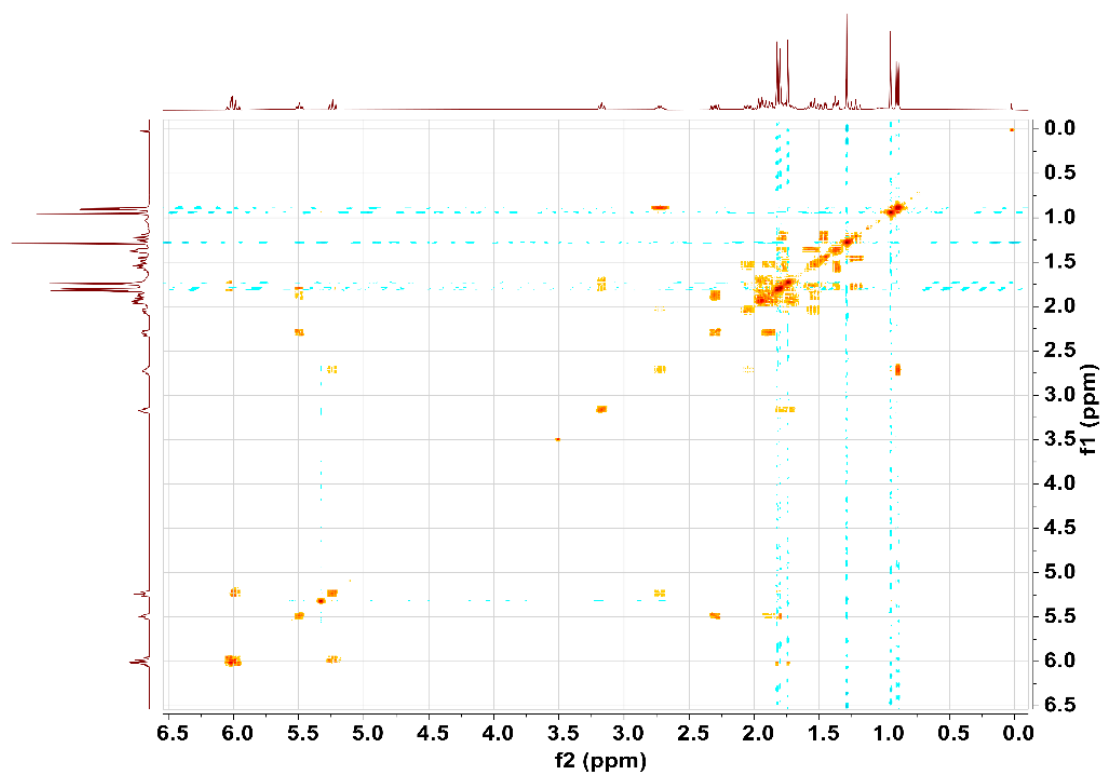

Figure S33  $^1\text{H}$ - $^1\text{H}$  COSY spectrum of compound **10** (400 MHz,  $\text{CDCl}_3$ )

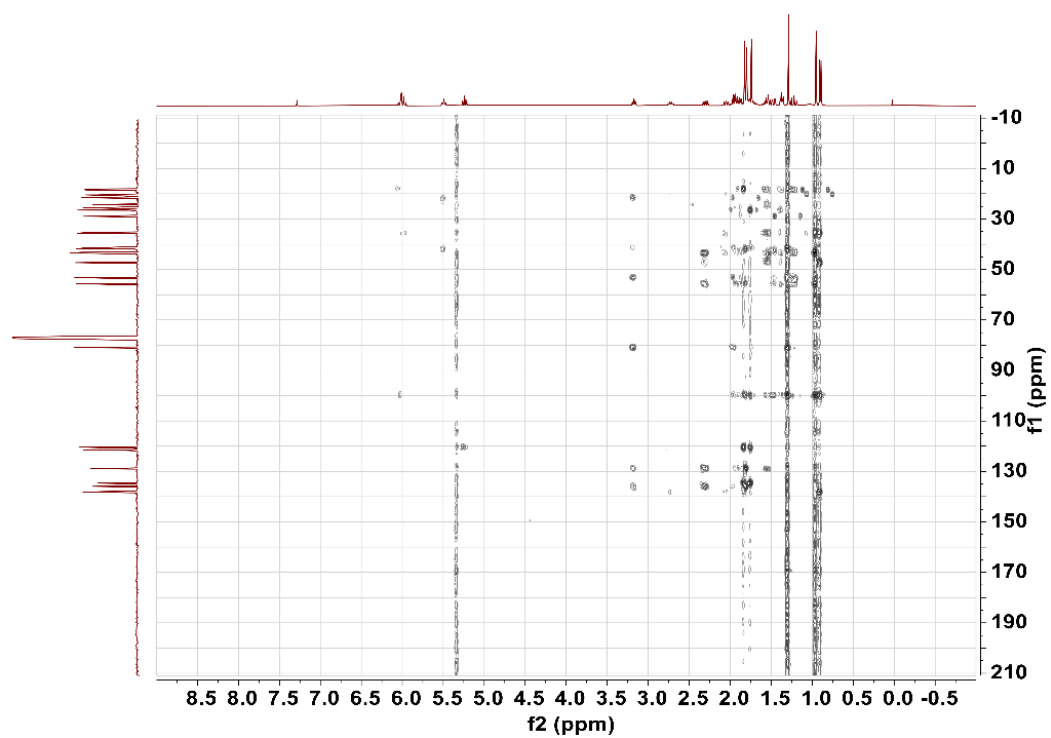

Figure S34 HMBC spectrum of compound **10** (400 MHz,  $\text{CDCl}_3$ )

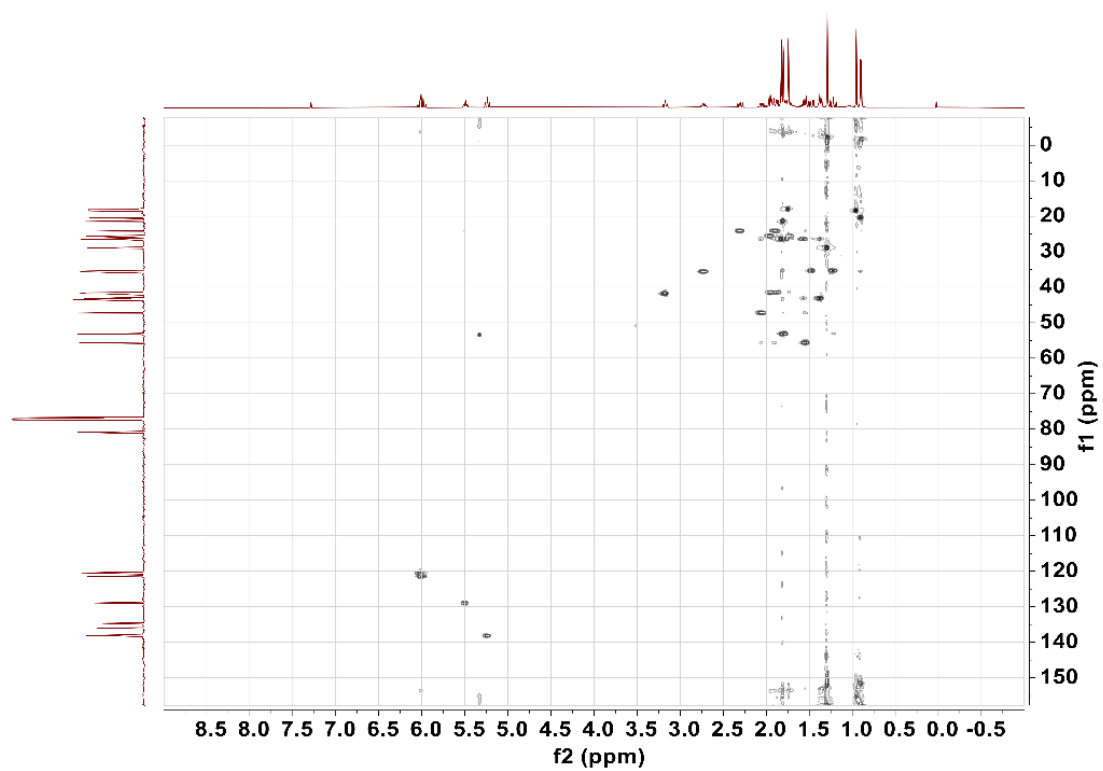

**Figure S35** HSQC spectrum of compound **10** (400 MHz, CDCl<sub>3</sub>)

## Supplementary references

1. Wei, H., Itoh, T., Kinoshita, M., Nakai, Y., Kurotaki, M., & Kobayashi, M. Cytotoxic sesterterpenes, 6-epi-ophiobolin G and 6-epi-ophiobolin N, from marine derived fungus *Emericella varicolor* GF10. *Tetrahedron*. **2004**, 60, (28), 6015-6019.
2. Chiba, R., Minami, A., Gomi, K., & Oikawa, H. Identification of ophiobolin F synthase by a genome mining approach: a sesterterpene synthase from *Aspergillus clavatus*. *Org. Lett.* **2012**, 15, (3), 594-597.
3. Zhu, T., Lu, Z., Fan, J., Wang, L., Zhu, G., Wang, Y., Li, X., Hong, K., Piyachaturawat, P., Chairoungdua, A., & Zhu, W. Ophiobolins from the mangrove fungus *Aspergillus ustus*. *J. Nat. Prod.* **2018**, 81, (1), 2-9.
4. Chai, H., Yin, R., Liu, Y., Meng, H., Zhou, X., Zhou, G., Bi, X., Yang, X., Zhu, T., Zhu, W., Deng, Z., & Hong, K. Sesterterpene ophiobolin biosynthesis involving multiple gene clusters in *Aspergillus ustus*. *Sci. Rep.* **2016**, 6, 27181-27191.
5. Narita, K., Chiba, R., Minami, A., Kodama, M., Fujii, I., Gomi, K., & Oikawa, H. Multiple oxidative modifications in the ophiobolin biosynthesis: P450 oxidations found in genome mining. *Org. Lett.* **2016**, 18, (9), 1980-1983.
